# Supplementary material for: On the reproducibility of science: unique identification of research resources in the biomedical literature
Source: PeerJ. 2013 Sep 5;1:e148. doi: 10.7717/peerj.148 (PMC3771067; doi:10.7717/peerj.148)
Supplement: Table S1 [file peerj-01-148-s001.xlsx]

## Sheet: Metadata 
PMID	Journal	Domain	Impact factor number	Journal reporting requirement
23313552	Cell	Cell biology	32.403	medium
22754503	Front Neural Circuits	Neuroscience	5.098	low
15901783	J Neurosci	Neuroscience	7.115	low
16597718	J Neurosci	Neuroscience	7.115	low
17522311	J Neurosci	Neuroscience	7.115	low
19474329	J Neurosci	Neuroscience	7.115	low
22553016	J Neurosci	Neuroscience	7.115	low
17093092	J Neurosci	Neuroscience	7.115	low
22674266	J Neurosci	Neuroscience	7.115	low
20802489	Nat Neurosci	Neuroscience	15.531	low
18084286	Nat Neurosci	Neuroscience	15.531	low
22245570	Cell Metab	Cell biology	13.668	low
23052218	Cell Mol Life Sci.	Cell biology	6.57	low
23122293	Cell Stem Cell.	Cell biology	25.421	medium
23219724	Curr Biol	Cell biology	9.647	low
23165295	Dev Biol	Developmental biology	4.069	medium
23228892	Dev Biol	Developmental biology	4.069	medium
23228893	Dev Biol	Developmental biology	4.069	medium
23201575	Dev Biol	Developmental biology	4.069	medium
23220656	Dev Biol	Developmental biology	4.069	medium
23201120	Dev Cell	Developmental biology	14.03	low
23293289	Development	Developmental biology	6.596	low
23293297	Development	Developmental biology	6.596	low
23318642	Development	Developmental biology	6.596	low
23362350	Development	Developmental biology	6.596	low
23325758	Development	Developmental biology	6.596	low
23202854	EMBO J	Cell biology	9.205	high
23382464	J Cell Biol	Cell biology	10.264	low
22946052	J Cell Science	Cell biology	6.111	low
22736487	J Comp Neurol	Neuroscience	3.808	high
23345232	J Neurosci	Neuroscience	7.115	low
23345245	J Neurosci	Neuroscience	7.115	low
23345247	J Neurosci	Neuroscience	7.115	low
23365220	J Neurosci	Neuroscience	7.115	low
23365253	J Neurosci	Neuroscience	7.115	low
23314057	Nat Med.	Cell biology	22.462	low
22920725	Neural Dev	Developmental biology	3.703	low
23111152	Neural Dev	Developmental biology	3.703	low
23326364	PLoS One	General biology	4.092	medium
23349976	PLoS One	General biology	4.092	medium
23285103	PLoS One	General biology	4.092	medium
23413262	Brain	Neuroscience	9.457	low
23260147	Cell	Cell biology	32.403	medium
23273991	Cell	Cell biology	32.403	medium
23273992	Cell	Cell biology	32.403	medium
23273993	Cell	Cell biology	32.403	medium
23201577	Dev Biol	Developmental biology	4.069	medium
23313124	Developmental Biology	Developmental biology	4.069	low
23313125	Developmental Biology	Developmental biology	4.069	low
23313126	Developmental Biology	Developmental biology	4.069	low
23313818	Developmental Biology	Developmental biology	4.069	low
23318633	Developmental Biology	Developmental biology	4.069	low
23322301	Genes and Development	Developmental biology	11.659	high
23322302	Genes and Development	Developmental biology	11.659	high
23348839	Genes and Development	Developmental biology	11.659	high
23348840	Genes and Development	Developmental biology	11.659	high
23348841	Genes and Development	Developmental biology	11.659	high
23273845	Immunity	Immunology	21.637	medium
23290520	Immunity	Immunology	21.637	medium
23290521	Immunity	Immunology	21.637	medium
23290522	Immunity	Immunology	21.637	medium
23313589	Immunity	Immunology	21.637	medium
22976307	J Cell Science	Cell biology	6.111	low
23321639	J Cell Science	Cell biology	6.111	low
23321640	J Cell Science	Cell biology	6.111	low
23321641	J Cell Science	Cell biology	6.111	low
23321642	J Cell Science	Cell biology	6.111	low
23321643	J Cell Science	Cell biology	6.111	low
23296922	J Comp Neurol	Neuroscience	3.808	high
23322443	J Comp Neurol	Neuroscience	3.808	high
23322491	J Comp Neurol	Neuroscience	3.808	high
23322532	J Comp Neurol	Neuroscience	3.808	high
23322547	J Comp Neurol	Neuroscience	3.808	high
23325254	J Neurosci	Neuroscience	7.115	low
23325261	J Neurosci	Neuroscience	7.115	low
23325262	J Neurosci	Neuroscience	7.115	low
23172145	Nature	General biology	36.28	low
23334414	Nature	General biology	36.28	low
23334416	Nature	General biology	36.28	low
23334418	Nature	General biology	36.28	low
23334421	Nature	General biology	36.28	low
23263555	Nature Immunology	Immunology	26.008	low
23263556	Nature Immunology	Immunology	26.008	low
23263557	Nature Immunology	Immunology	26.008	low
23291597	Nature Immunology	Immunology	26.008	low
23314004	Nature Immunology	Immunology	26.008	low
23226106	PLoS Biology	General biology	4.092	medium
23271953	PLoS Biology	General biology	4.092	medium
23300376	PLoS Biology	General biology	4.092	medium
23300383	PLoS Biology	General biology	4.092	medium
23300384	PLoS Biology	General biology	4.092	medium
23285014	PLoS One	General biology	4.092	medium
23285115	PLoS One	General biology	4.092	medium
23307741	Science	General biology	31.201	low
23329046	Science	General biology	31.201	low
23329048	Science	General biology	31.201	low
23329049	Science	General biology	31.201	low
23329051	Science	General biology	31.201	low
20669363	J Neurosci Methods	Neuroscience	1.98	medium
23262469	Neuroreport	Neuroscience	1.656	low
23157381	Dev Growth Differ	Developmental biology	2.21	low
23350700	Dev Growth Differ	Developmental biology	2.21	low
23261831	CELL IMMUNOL	Immunology	1.974	low
23261832	CELL IMMUNOL	Immunology	1.974	low
23298864	CELL IMMUNOL	Immunology	1.974	low
23298865	CELL IMMUNOL	Immunology	1.974	low
23298866	CELL IMMUNOL	Immunology	1.974	low
23302023	Dev Growth Differ	Developmental biology	2.21	low
23302037	Dev Growth Differ	Developmental biology	2.21	low
23278717	Dev Growth Differ	Developmental biology	2.21	low
23305125	Dev Growth Differ	Developmental biology	2.21	low
23072729	Gene Expr Patterns	Developmental biology	2.016	low
23264111	J MOL HISTOL	Cell biology	1.484	low
23269505	J MOL HISTOL	Cell biology	1.484	low
23271141	J MOL HISTOL	Cell biology	1.484	low
23277184	J MOL HISTOL	Cell biology	1.484	low
23307302	J MOL HISTOL	Cell biology	1.484	low
23291919	MOL CELL BIOCHEM	Cell biology	2.057	low
23291979	MOL CELL BIOCHEM	Cell biology	2.057	low
23291980	MOL CELL BIOCHEM	Cell biology	2.057	low
23292031	MOL CELL BIOCHEM	Cell biology	2.057	low
23315288	MOL CELL BIOCHEM	Cell biology	2.057	low
23262504	Neuroreport	Neuroscience	1.656	low
23274702	Neuroreport	Neuroscience	1.656	low
23282990	Neuroreport	Neuroscience	1.656	low
23324648	Neuroreport	Neuroscience	1.656	low
23154073	NEUROSCI RES	Neuroscience	2.25	low
23201176	NEUROSCI RES	Neuroscience	2.25	low
23228673	NEUROSCI RES	Neuroscience	2.25	low
23257508	NEUROSCI RES	Neuroscience	2.25	low
23305954	NEUROSCI RES	Neuroscience	2.25	low
23298196	SCAND J IMMUNOL	Immunology	2.23	low
23298254	SCAND J IMMUNOL	Immunology	2.23	low
23298273	SCAND J IMMUNOL	Immunology	2.23	low
23298316	SCAND J IMMUNOL	Immunology	2.23	low
23298344	SCAND J IMMUNOL	Immunology	2.23	low
23021200	ZYGOTE	Developmental biology	1.171	low
23174120	ZYGOTE	Developmental biology	1.171	low
23186935	ZYGOTE	Developmental biology	1.171	low
23199370	ZYGOTE	Developmental biology	1.171	low
23211737	ZYGOTE	Developmental biology	1.171	low
17996088	BMC Neurosci	Neuroscience	3.042	low
17928562	J Neurophysiol	Neuroscience	3.316	medium
22815400	J Neurophysiol	Neuroscience	3.316	medium
23043290	BMC Developmental Biology	Developmental biology	2.79	low
23378677	Cell Division	Cell biology	3	low
23074011	Dev Dyn	Developmental biology	2.536	low
23109401	Dev Dyn	Developmental biology	2.536	low
23192979	Dev Dyn	Developmental biology	2.536	low
22865660	Dev Neurobiol	Developmental biology	3.551	low
22648905	Dev Neurobiol	Developmental biology	3.551	low
22888055	Dev Neurobiol	Developmental biology	3.551	low
23165607	Immunol Cell Biol	Cell biology	3.661	low
23124967	Int J Dev Biol.	Developmental biology	2.823	low
23184466	Birth Defects Res A Clin Mol Teratol.	Developmental biology	2.742	low
10879655	BMC Developmental Biology	Developmental biology	2.79	low
23116063	BMC Developmental Biology	Developmental biology	2.79	low
23217079	BMC Developmental Biology	Developmental biology	2.79	low
23244389	BMC Developmental Biology	Developmental biology	2.79	low
23289785	BMC Developmental Biology	Developmental biology	2.79	low
22985877	Cell Division	Cell biology	3	low
23173571	Cell Division	Cell biology	3	low
23234503	Cell Division	Cell biology	3	low
23253261	Cell Division	Cell biology	3	low
23286511	Cell Division	Cell biology	3	low
11449355	Cytokine	Immunology	3.019	low
23290865	Cytokine	Immunology	3.019	low
23294974	Cytokine	Immunology	3.019	low
23312859	Cytokine	Immunology	3.019	low
23317878	Cytokine	Immunology	3.019	low
23106570	Eur J Neurosci	Neuroscience	3.631	low
23311955	IMMUNOLOGY	Immunology	3.321	low
23317140	IMMUNOLOGY	Immunology	3.321	low
23320737	IMMUNOLOGY	Immunology	3.321	low
23323935	IMMUNOLOGY	Immunology	3.321	low
23311920	IMMUNOLOGY	Immunology	3.321	low
23107604	Int J Biochem Cell Biol	Cell biology	3.661	low
23290828	Journal of Neuroimmunology	Neuroscience	2.959	low
23294897	Journal of Neuroimmunology	Neuroscience	2.959	low
23305745	Journal of Neuroimmunology	Neuroscience	2.959	low
23313381	Journal of Neuroimmunology	Neuroscience	2.959	low
23318105	Journal of Neuroimmunology	Neuroscience	2.959	low
23059197	Mechanisms of Development	Developmental biology	2.833	low
23072875	Mechanisms of Development	Developmental biology	2.833	low
23085574	Mechanisms of Development	Developmental biology	2.833	low
23238120	Mechanisms of Development	Developmental biology	2.833	low
23313141	Mechanisms of Development	Developmental biology	2.833	low
23070877	Microsc Res Tech	General biology	1.792	low
23127802	Mol Cell Endocrinol.	Cell biology	4.192	low
23147113	Molecular and Cellular Neuroscience	Cell biology	3.663	low
23159779	Molecular and Cellular Neuroscience	Cell biology	3.663	low
23159780	Molecular and Cellular Neuroscience	Cell biology	3.663	low
23246669	Molecular and Cellular Neuroscience	Cell biology	3.663	low
23267846	Molecular and Cellular Neuroscience	Cell biology	3.663	low
23219907	Neuroscience	Neuroscience	3.38	low
23313709	Neuroscience	Neuroscience	3.38	low
23313710	Neuroscience	Neuroscience	3.38	low
23318243	Neuroscience	Neuroscience	3.38	low
23321539	Neuroscience	Neuroscience	3.38	low
23321541	Neuroscience	Neuroscience	3.38	low
23325258	Journal of Neuroscience	Neuroscience	3.38	low
23325260	Journal of Neuroscience	Neuroscience	3.38	low
21602912	Front Neurosci.	other	N/A	low
22215995	PLoS Computational Biology	other	5.215	low
21436050	Proc Natl Acad Sci U S A.	other	9.681	high
22985331	ACS Chem Biol.	other	6.446	low
23138533	ACS Chem Biol.	other	6.446	low
22907836	Amino Acids	other	3.248	medium
23266606	Biochem Biophys Res Commun	other	2.484	low
23178298	Biochem Biophys Res Commun.	other	2.484	low
23336074	Biol Open	other	N/A	low
22947103	BMC Genomics.	other	4.073	medium
23007696	Clin Exp Metastasis	other	N/A	low
23295741	Endocrinology	other	4.459	medium
23231968	Eur J Med Chem	other	3.346	low
23108159	Hum Mol Genet	other	7.636	medium
23197652	Hum Mol Genet	other	7.636	medium
23087022	Hum Mol Genet	other	7.636	medium
23059813	Hum Mol Genet.	other	7.636	medium
23382343	ILAR J.	other	N/A	low
23132861	J Biol Chem	other	4.773	low
23166330	J Biol Chem	other	4.773	low
23184941	J Biol Chem	other	4.773	low
23229546	J Biol Chem	other	4.773	low
22843140	J Comp Physiol B	other	1.966	low
23412429	Mol Biosyst.	other	3.534	medium
23292650	Nat Chem Biol.	other	14.69	medium
23201900	Nat Chem Biol.	other	14.69	medium
23314171	Nat Methods	other	19.276	medium
23143102	Nucleic Acids Res	other	8.026	medium
23159952	Osteoarthritis Cartilage	other	3.904	low
23349637	PLoS Genet	other	8.694	medium
23302694	Proc Natl Acad Sci U S A.	other	9.681	high
23267077	Proc Natl Acad Sci U S A.	other	9.681	high
23378909	Sci Rep.	other	N/A	medium
23174774	Theriogenology	other	1.963	low
23174481	Toxicol Appl Pharmacol.	other	4.447	low
22706793	Transgenic Res.	other	2.754	low

## Sheet: Antibodies
PMID	Author supplied reagent Name	If public or commercial, is it identifiable in a relevant database or vendor site?	Is the antibody identifiable in the AR?	Antibody registry ID	If obtained from non-commercial source, is a reference/source identifiable?	Non-commercial and the target is identifiable	Catalog number	Lot number	Source organism	Target uniquely identifiable?	Clone ID	If uniquely identifiable, is the info in the paper or supplementary data?	Uniquely identifiable?
23052218	HuC/HuD	n	n				n	n	n	n	n	na	y
23052218	Islet1/2	y	y				n	n	n	n	n	paper	y
23052218	znp-1	y	y				n	n	n	n	n	paper	y
23052218	3A10	y	n				n	n	n	n	n	paper	y
23052218	a-tubulin	n	n				n	n	n	n		na	n
23122293	CD41 (MWreg-30)	n	n				n	n	y	n	y	na	n
23122293	c-kit (2B8)	n	n				n	n	n	n	y	na	n
23122293	CD34 (RAM34)	n	n				n	n	n	n	y	na	n
23122293	CD45 (30-F11)	n	n				n	n	n	n	y	na	n
23122293	VE-cadherin (11D4.1)	n	n				n	n	n	n	y	na	n
23122293	ter119 (ter119)	n	n				n	n	n	n	n	na	n
23122293	CD3(145-2C11)	n	n				n	n	n	n	y	na	n
23122293	CD4 (GK1.5)	n	n				n	n	n	n	y	na	n
23122293	CD8 (536.7)	n	n				n	n	n	n	n	na	n
23122293	IgM (11/41)	n	n				n	n	n	n	n	na	n
23122293	CD19 (1D3)	n	n				n	n	n	n	n	na	n
23122293	Gr-1 (RB6-8C5)	n	n				n	n	n	n	y	na	n
23122293	Mac-1 (M1/70)	n	n				n	n	n	n	y	na	n
23122293	CD48 (HM48-1)	n	n				n	n	n	n	y	na	n
23122293	CD150 (TC15-12F122)	n	n				n	n	n	n	y	na	n
23122293	Sca-1 (E13-161.7)	n	n				n	n	n	n	n	na	n
23122293	anti-rat PE-Cy5	y	y				n	n	n	y	n	supplement	y
23122293	anti-rat FITC	y	y				n	n	n	y	n	supplement	y
23122293	anti-rat APC	n	n				n	n	n	y	n	na	n
23219724	mouse anti-GFP	y	y				y	n	y	n	n	supplement	y
23219724	rabbit anti-DsRed	y	y				y	n	y	n		supplement	y
23219724	anti-V5	y	n				y	n	n	n	n	supplement	y
23202854	ZO1	y	y				y	n	y	n	n	supplement	y
23202854	Phospho-Histone-H3	y	y				y	n	y	n		supplement	y
23202854	PKCζ	y	y				y	n	y	n		supplement	y
23202854	Crb2a	y	y				y	n	y	n	n	supplement	y
23382464	HNK-1	y	y				y	n	n	n	n	paper	y
23382464	rabbit anti-GFP	n	n				n	n	y	y	n	na	n
23382464	HuC	y	y				n	n	y	n	n	paper	y
23314057	Dll4	y	y				y	n	n	n		supplement	y
23314057	Jag1	y	n				y	n	n	n		supplement	y
23314057	N1ICD	y	y				y	n	n	n		supplement	y
23314057	Mib1	n	n		n	n		n	n		n	na	n
23314057	N2ICD	y	y				y	n	n	n		supplement	y
23314057	GFP	y	y				y	n	n	y	n	supplement	y
23314057	α-tubulin	y	y				y	n	n	n	n	supplement	y
23314057	β-actin	y	y				y	n	n	n	n	supplement	y
23314057	Jag1	y	y				y	n	n	n		supplement	y
23313552	Rabbit anti-Tuj1 (Covance, 1:1,000)	y	y	AB_663339			n	n	y	y	n	sup	y
23313552	Mouse anti-Tuj1 (Covance, 1:1,000)	y	y	AB_663338			n	n	y	y	n	sup	y
23313552	Rabbit anti-MAP2 (Cell Signaling Technology, 1:200)	n	n				n	n	y	y	n	sup	n
23313552	Mouse anti-NeuN (Milipore, 1:200)	n	n				n	n	y	y	n	sup	n
23313552	Rabbit anti- Synapsin I (Sigma, 1:1000)	y	y	AB_261457			n	n	y	y	na	sup	y
23273993	-p65 (Neo-Markers, RB-1638)	y	y	multiple			y	n	n	y	na	sup	y
23273993	α-c-myc (SC-788),	y	y	AB_631277			y	n	n	y	na	sup	y
23273993	α-β−catenin (SC-1496),	y	y	AB_1563968			y	n	n	y	na	sup	y
23273993	α-EphB3 (R&D Systems, AF432),	y	y	AB_2099979			y	n	n	y	na	sup	y
23273993	a-ASCL-2 (Aviva Systems Biology, QC6671)	n	n				y	n	n	y	n	sup	n
23273992	Antibodies for RNA Pol II were purchased from Covance (8WG16)	y	y	AB_291520			y	n	n	y	n	sup	y
23273992	Antibodies for RNA Pol II were purchased from Santa Cruz (N-20),	y	y	AB_632359			n	n	n	y	na	sup	y
23273992	Med1 from Bethyl (A300-793A),	y	n				y	n	n	y	na	sup	y
23273992	Smc1a from Bethyl (A300-055A),	y	y	AB_2192467			y	n	n	y	na	sup	y
23273992	Smc3 from Abcam (ab9263)	y	y	AB_307122			y	n	n	y	na	sup	y
23260147	Thy1.2-PE	y	y	AB_465775			n	n	n	y	y	sup	y
23260147	Thy1.2-eFluor450	y	y	AB_1272237			n	n	n	y	y	sup	y
23260147	SSEA-1	y	n				y	n	n	y	n	sup	y
23260147	SSEA-1 biotin	y	y	AB_657625			n	n	n	y	y	sup	y
23260147	SSEA-1 AlexaFluor647	y	y	AB_1089191			n	n	n	y	y	sup	y
22976307	mouse mAb502 to endolyn		n		y	n		n	y		n	na	n
22976307	polyclonal antibody 1637 to aminopeptidase N		n		y	n		n	y		n	na	n
22976307	polyclonal antibody against rat endolyn	n	n		n	y	n	n	n			na	n
22976307	anti-Na+K+-ATPase antibody	n	n		n	n	n	n	n			na	n
22976307	rat monoclonal antibody against ZO-1	n	n		y	n	n	n	y		n	na	n
22976307	monoclonal antibody 3G8	n	n		y	n	n	n	n		n	na	n
22946052	L-plastin	n	n		y	y		n	y			na	n
23321643	mouse anti-HA (1/1000) (BabCO)	n	n				n	n	n	y	n	paper	n
23321643	mouse anti-pTyr (1/3000)(4G10)	n	n				n	n	n	y	n	paper	n
23321643	mouse anti-Dlg4F3 antibody	n	n				n	n	n	y	n	paper	n
23321643	mouse anti-Gli IF6.3		n		y	y		n	y		y	paper	y
23321643	rabbit anti-Gli at 1:300 (Venema et al., 2004)		n		y	n		n	n		n	paper	n
23321642	Cx43 antibody was from Cell Signaling (#3512)	y	y	AB_2294590			y	n	y	y	na	paper	y
23321642	GAPDH antibody was from AbCam (#ab22555).	y	y	AB_447153			y	n	n	y	na	paper	y
23321642	mouse monoclonal antibody to GFAP (E16510 Spring Bioscience)		y	AB_1661180			y	n	y	y	n	paper	y
23321641	antibody for γ-Tubulin (sc-17787; Santa Cruz Biotechnology,	y	y	AB_628417			y	n	n	y	n	paper	y
23321641	NPM	y	y	AB_2155178			y	n	n	y	na	paper	y
23321641	p-NPM	y	n				y	n	n	y	na	paper	y
23321641	p-Rb 780	y	y	AB_330015			y	n	n	y	na	paper	y
23321641	p-Rb 795	y	y				y	n	n	y	na	paper	y
23321640	xPAK1		n		y	n		n	n		n	paper	n
23321640	xPAK2		n		y	n		n	n		n	paper	n
23321640	βPAK3 (N-19, Santa Cruz Biotechnology)	y	y	AB_2236769			n	n	n	y	na	paper	y
23321640	pS3-ADF/cofilin (pS3-XAC1; kind gift from James Bamburg, Colorado State University)		n		y	y		n	n		n	paper	y
23321640	pS19-MLC2 (Cell Signaling Technology, Danvers, MA)	n	n				n	n	n	n	n	paper	n
23321639	rabbit polyclonal anti-Panx1 antibody (1:100)		n		y	y		n	y		na	paper	y
23321639	monoclonal anti- -actinin antibody (1:200) (Sigma-Aldrich)	n	n				n	n	n	y	n	paper	n
23321639	monoclonal anti-Cav1.1 a1s antibody (1:100) (Thermo Scientific, Waltham, MA, USA)	n	n	n			n	n	n	y	n	paper	n
23165295	Anti-Phosphohistone H3	n	n				n	n	y	n	n	na	n
23228892	rabbitanti-GFPantibody	n	n				n	n	y	y	n	na	n
23228893	anti-vasa		n		y	n	n	n	n			na	n
23228893	anti-PH3	n	n				n	n	n	n	n	na	n
23228893	anti-gammaH2AX		n		n	n	n	n	n		n	na	n
23228893	Mouse Anti-BrdU	y	y				n	n	y	n	y	paper	y
23201577	antiacetylated tubulin	n	n		n	n	n	n	n		n	na	n
23201575	4D2	n	y		y	y	n	n	y		y	paper	y
23201575	Rabbit anti-GFP	n	n				n	n	y	n	n	na	n
23362350	rabbit anti-DsRed	y	y				n	n	y	y		paper	y
23293297	anti-Mef2	n	n				n	n	y	n	n	na	n
23293297	anti-PCNA	n	n				n	n	y	n	n	na	n
23293297	anti-Myosin heavy chain	y	y				n	n	y	n	y	paper	y
23293297	anti-IGF-1Rbeta	n	n				n	n	y	n	n	na	n
23293297	anti-GFP	n	n				n	n	y	y	n	na	n
23325758	zn-12	y	y	AB_10013761			y	n	n	n	n	paper	y
23325758	RFP	n	n				n	n	n	n	n	na	n
23325758	GFP-Alexa488	n	n				n	n	n	n	n	na	n
23325758	HuC/D	n	n				n	n	n	n	n	na	n
23318633	anti-dsRed (Clontech),	n	n				n	n	n	y	n	paper	n
23318633	anti-MyosinVI (Proteus Biosciences)	y	y	AB_10013626			n	n	n	y	n	paper	y
23318633	anti-MyosinVIIa (Developmental Studies Hybridoma bank)	y	y	AB_2282417			n	n	n	y	n	paper	y
23318633	nti-Sox2, Santa Cruz,	n	n				n	n	n	y	n	paper	n
23318633	anti-p75NTR	n	n				n	n	n	y	n	paper	n
23318633	anti-Prox1 (Covance)	y	y	AB_291595			n	n	n	y	n	paper	y
23318633	chicken anti-peptide antibody		n		y	y			y		n	paper	y
23313818	anti-Ezrin (BD Transduc- tion Laboratories)	y	y	AB_397939			n	n	n	y	n	paper	y
23313818	phospho-Ezrin (Thr567)/Radixin (Thr564)/Moesin (Thr558) antibody (Cell Signaling Technology),	n	n				n	n	n	y	n	paper	n
23313818	nti-E-Cadherin (BD Transduction Laboratories)	n	n				n	n	n	y	n	paper	n
23313818	anti-aPKC (Santa Cruz)	n	n				n	n	n	y	n	paper	n
23313818	anti- Ras (Upstate)	n	n				n	n	n	y	n	paper	n
23313126	Mouse anti-pSTAT 1:3000 (developed in this study)		n		y	n		n	y		n	paper	n
23313126	rabbit anti-b-galactosidase 1: 200 (Cappel)	n	n				n	n	y	y	n	paper	n
23313126	Mouse anti-Upd antibody was used at 1:50 (developed in this study		n		y	n		n	y		n	paper	n
23313125	rabbit anti-phosphorylated Erk1/2 (Cell signaling, 1:200)	n	n				n	n	y	y	n	paper	n
23313125	rabbit anti-cleaved Caspase 3 (Cell Signaling, 1:200)	n	n				n	n	y	y	n	paper	n
23313125	rabbit anti-phosphorylated Histone (Millipore, 1:1000),	n	n				n	n	y	y	n	paper	n
23313125	mouse anti-CSPG (DSHB, 9BA12, 1:10)	y	y	AB_528185			y	n	y	y	n	paper	y
23313125	mouse anti-aggrecan (DSHB, 12/21/1-C-6	y	y	AB_531912			y	n	y	y	n	paper	y
23313124	FITC-labeled anti-D. mucoroides spore IgG		n		y	y		n	n		n	paper	y
23348841	mouse anti-V5 antibody (AbD Serotec, dilution 1:5,000	n	n				n	n	y	y	n	sup	n
23348841	horseradish peroxidase-linked anti-HA antibody (Roche, dilution 1:5,000	n	n				n	n	y	y	n	sup	n
23348841	monoclonal anti- GFP antibodies (Roche, 1:3,000)	y	y	AB_390913			n	n	n	y	n	sup	y
23348841	anti-RENT1 (UPF1) antibody (Bethyl, 1:3,000	n	n				n	n	n	y	n	sup	n
23348841	phospho-(Ser/Thr) ATM/ATR substrate antibody (Cell Signalling, 1:2,000	n	n				n	n	n	y	n	sup	n
23348840	Rabbit polyclonal antibodies against CEP83,	n	n				n	n	y	n	n	paper	n
23348840	Odf2	n	n				n	n	y	y	n	paper	n
23348840	FBF1,	y	y	AB_1848440			n	n	y	y	n	paper	y
23348840	SCLT1,	y	n				n	n	y	y	n	paper	y
23348840	Cep164 rabbit antibody was from Strategic Diagnotics (1:5000)	y	n				n	n	y	y	n	paper	y
23348840	mouse Cep164 antibody (1:250) was a kind gift from Eva Lee (University of California at Irvine)		n		y	n		n	y		n	paper	n
23348839	anti-pS505-dAKT	y	n				n	n	n	y	n	sup	y
23348839	anti-AKT, (Cell Signaling Technology	n	n				n	n	n	y	n	sup	n
23348839	anti-Actin (Millipore	n	n				n	n	n	y	n	sup	n
23348839	anti-FLAG	n	n				n	n	n	y	n	sup	n
23348839	anti-HA (Sigma Aldrich)	n	n				n	n	n	y	n	sup	n
23348839	anti-TH antibody was generated as described (Yang et al., 2006		n		y	y		n	n		n	sup	y
23348839	Anti-Trc		n		y	y		n	n		n	sup	y
23348839	anti-pS292-Trc		n		y	y		n	n		n	sup	y
23348839	anti-pT453-Trc antibodies were generous gifts from Dr. Emoto.		n		y	y		n	n		n	sup	y
23322302	mouse anti- RBF (DX5- 1:5	n	n				n	n	y	y	n	paper	n
23322302	rabbit anti-CC3 (1:100; Cell Signaling	n	n				n	n	y	y	n	paper	n
23322302	rabbit anit- pH2AV (1:500; Abnova)	y	y	AB_1717378			n	n	y	y	n	paper	y
23322302	mouse anti-BrdU (1:100; Beckton Dickinson	n	n				n	n	y	y	n	paper	n
23322301	anti-NKX2-1 antibody (Bethyl Laboratories, BL-4000	n	n				y	n	n	y	n	paper	n
23322301	anti-LMO3 antibody (a gift from Dr. Nakagawara, Chiba Cancer Center, Chiba, Japan)		n		y	n		n	n		n	paper	n
23322301	anti- FOXA1 antibody (Abcam, ab23738	y	y	AB_2104842			y	n	n	y	n	paper	y
23322301	nti-vinculin antibody (Sigma).	n	n				n	n	n	y	n	paper	n
23111152	Anti-zpr1	y	y				y	n	n	n	n	paper	y
23111152	anti-zpr3	y	y				y	n	n	n	n	paper	y
23111152	anti-zn12	y	y				y	n	n	n	n	paper	y
23111152	anti-zn5	y	y				y	n	n	n	n	paper	y
23111152	Rabbit anti-phosphohistone 3 (pH3)	n	n		n	n		n	y		n	na	n
23111152	rabbit anti-Mdka antibody		n		y	y		n	y			paper	y
23111152	anti-GFP	n	n				n	n	y	y		na	n
23111152	anti-actin	n	n				n	n	n	n	n	na	n
23111152	mouse anti-BrdU	n	n				n	n	y	y	n	na	n
23111152	mouse anti-HPC-1	y	n				y	n	y	y	y	paper	y
22920725	rat anti-BrdU	n	n				n	n	y	n		na	n
22920725	mouse anti-BrdU	n	n				n	n	y	n	n	na	n
22920725	mouse zpr-1	y	y				y	n	y	n	n	paper	y
22920725	mouse zpr- 3	y	y				y	n	y	n	n	paper	y
22920725	mouse anti-PCNA	n	n				n	n	y	n	n	na	n
22920725	rabbit anti-GFP	n	n				n	n	y	n	n	na	n
22920725	mouse zrf-1	y	y				y	n	y	n	n	paper	y
22920725	rabbit anti-β-catenin	n	n				n	n	y	n	n	na	n
22920725	anti-active-β-catenin	n	n				n	n	y	n	n	na	n
22920725	rabbit anti-Pax6	n	n				n	n	y	n	n	na	n
22920725	rabbit anti-Sox2	n	n				n	n	y	n	n	na	n
23326364	rabbit anti-acetylated-a-Tubulin	y	y				y	n	y	n	n	paper	y
23326364	rabbit primary antibodies against zebrafish Mmp14a	y	y				y	n	y	y		paper	y
23326364	mouse MMP14	y	y				y	n	y	n		paper	y
23326364	zebrafish Mmp2	n	y				y	n	n	y		paper	n
23326364	mouse MMP2	y	y				y	n	n	y		paper	y
23326364	anti-BrdU	y	y				y	n	n	n	n	paper	y
23326364	anti-Pax6	y	n				y	n	n	n		paper	y
23326364	anti-Pax6a	y	y				y	n	n	n		paper	y
23326364	anti-Phospho- Histone H3	y	y				y	n	n	n		paper	y
23326364	Anti-Zn5	y	y				y	n	n	n	n	paper	y
23326364	anti-Zpr1	y	y				y	n	n	n	n	paper	y
23326364	anti-Zrf1	y	y				y	n	n	n	n	paper	y
23285115	polyclonal antibody for G6fL		n			y		n	y	y		paper	y
23285014	rabbit anti-TAG-1		n		y	y			y			paper	n
23285014	mouse anti-islet-1	n	n				n	n	y	n	n	na	n
23285014	mouse anti- GAPDH	n	n				n	n	y	n	n	na	n
23285103	VE-cadherin antibody	n	n		n	y	n	n	y			na	n
23334416	mouse anti-β-galactosidase (1:100, 40a-1, DSHB	y	n				y	n	y	y	na	paper	y
23334416	rabbit anti-β-galactosidase (1:1,000, Cappel	n	n				n	n	y	y	na	paper	n
23334416	rabbit anti-DsRed (1:5,000, BD Biosciences	n	n				n	n	y	y	na	paper	n
23334416	rat anti-DEcad (1:20, DSHB	y	y	AB_528120			n	n	y	y	na	paper	y
23334421	ME2	n	n				n	n	n	y	n	paper	n
23334421	actin	n	n				n	n	n	y	n	paper	n
23334421	b-tubulin (Sigma)	n	n				n	n	n	y	n	paer	n
23334421	AMPK	n	n				n	n	n	y	n	paper	n
23334421	Phospho-AMPK (Thr 172)	n	n				n	n	n	y	n	paper	n
23334418	PerCP-conjugated anti-CD90 (clone OX-7)	n	n				n	n	n	y	y	paper	n
23334418	FITC-conjugated anti-CD57 (clone VC1.1)	n	n				n	n	n	y	y	paper	n
23334414	CCR7 (4B12)	n	n				n	n	n	y	n	online methods	n
23334414	CD3 (145-2C11)	n	n				n	n	n	y	n	online methods	n
23334414	CD4 (L3T4)	n	n				n	n	n	y	n	online methods	n
23334414	CD19 (1D3)	n	n				n	n	n	y	n	online methods	n
23334414	CD25 (PC61)	n	n				n	n	n	y	n	online methods	n
23172145	neuroligin 1	y	y	mulitple			n	n	n	y	n	online methods	y
23172145	neuroligin 2/3,	n	n				n	n	n	y	n	online methods	n
23172145	neuroligin 2,	n	n				n	n	n	y	n	online methods	n
23172145	neuroligin 3,	n	n				n	n	n	y	n	online methods	n
23172145	VGAT (Synaptic Systems)	n	n				n	n	n	y	n	online methods	n
23271953	pre-immune CRP810_1.2 antibodies (1:1,000 dilution)	n	n				n	n	n	y	n	paper	n
23271953	anti-CRP810_1.2	n	n				n	n	n	y	n	paper	n
23226106	ms anti-Futsch		n		y	n		n	y		n	paper	n
23226106	guinea pig (gp) anti- NMNAT		n		y	y		n	y		n	paper	y
23226106	rat anti-HA (Roche, 1:100	y	y	AB_390919			n	n	y	y	n	paper	y
23226106	rat anti-elav (1:50)	n	n				n	n	n	y	n	paper	n
23226106	ms anti-Brp	n	n				n	n	n	y	n	paper	n
23300376	Affinity-purified rabbit antibodies against Cenp-C		n		y	n		n	y		n	paper	n
23300376	Hybridoma supernatant containing mouse monoclonal antibody eya10H6	y	y	AB_528232			n	n	y	y	n	paper	y
23300376	38F3 against NopI/Fibrillarin (Abcam, ab4566)	y	y	AB_304523			y	n	n	y	n	paper	y
23300376	anti-GFP antibody (Invitrogen)	n	n				n	n	n	y	n	paper	n
23300383	anti-b-actin (AC-15, Sigma	y	y	AB_476744			n						y
23300383	anti-cyclin D1 (DCS6, Novacastra),	y	n				n	n	n	y	y	paper	y
23300383	anti-cyclin E (HE12, sc-247, Santa Cruz),	y	y	AB_627357			y	n	n	y	y	paper	y
23300383	anti-ELF5/ESE2 (N20, sc-9645, Santa Cruz)	y	y	AB_640106			y	n	n	y	na	paper	y
23300384	P-EIF4E (Ser 209)	y	y	AB_331677			y	n	n	y	na	sup	y
23300384	EIF4E	y	y	AB_2097675			y	n	n	y	n	sup	y
23300384	P-EIF4G (Ser 1108)	y	y	AB_2277632			y	n	n	y	na	sup	y
23300384	EIF4G	y	y	AB_2096028			y	n	n	y	n	sup	y
23300384	P-EIF4B (Ser 422)	y	y	AB_2097522			y	n	n	y	na	sup	y
23329048	guinea pig-Olig2 (1:20,000; Ben Novitch)				y	n		n	y		n	sup	n
23329048	mouse anti- Isl2 (1:100; DSHB)	n	n				n	n	y	y	n	sup	n
23329048	goat anti-β-Gal (1:3000; Arnel)	y	n				n	n	y	y	n	sup	y
23329048	rat anti-BrdU (1:100; Sigma)	n	n				n	n	y	y	n	sup	n
23329048	Rabbit anti-Lbx1 (1:100; Martyn Goulding)		n		y	y		n	y		na	sup	y
23329049	goat polyclonal anti-CCL21	y	y	AB_2072083			n	n	y	y	na	sup	y
23329049	nti-CCL19 (R&D Systems)	y	y	AB_2071545			n	n	y	y	na	sup	y
23329049	polyclonal biotinylated anti-CCL21 (R&D Systems)	y	y	AB_2072082			n	n	y	y	na	sup	y
23329051	rabbit anti-GR (1:500, Santa Cruz Biotechnology, Santa Cruz, CA)	y	y	AB_2155786			n	n	y	y	na	sup	y
23307741	mouse anti-AQP4	n	n				n	n	y	n	n	sup	n
23307741	mouse anti-ALDH1L1	n	n				n	n	y	n	n	sup	n
23307741	rabbit anti-GLT1 antibody (1:150, custom made)		n		y	n		n	y		n	sup	n
23307741	mGluR5 and using the avidin biotin-peroxidase method and highly specific antibodies	n	n				n	n	n	n	n	sup	n
23307741	mGluR2/3	n	n				n	n	n	n	n	sup	n
23313589	mAbs CH58		n		y	y			y			paper	y
23313589	CH59		n		y	y			y			paper	y
23313589	mAb HG107		n		y	y			y			paper	y
23313589	human antirespiratory syncytial virus mAb	n	n				n	n	n	n	n	paper	n
23313589	V1-V2 bnAbs PG9		n		y	y			y			paper	y
23290522	PKCa antibody	y	y	AB_2284233			n	n	n	y	n	paper	y
23290521	B220 (RA3-6B2)	n	n				n	n	n	y	y	sup data	n
23290521	CD11b (M1/70)	n	n				n	n	n	y	y	sup data	n
23290521	CD11c (N418)	n	n				n	n	n	y	y	sup data	n
23290521	NK1.1 (PK136)	n	n				n	n	n	y	y	sup data	n
23290521	F4/80 (BM8)	n	n				n	n	n	y	y	sup data	n
23290520	c-kit (ACK2, eBioscience	y	y	AB_465815			n	n	n	y	y	paper	y
23290520	FcεRI (Mar-1, eBioscience)	n	n				n	n	n	y	y	paper	n
23290520	mouse IgE C38-2	n	n				n	n	y	y	n	paper	n
23290520	anti-CD31 APC (390, eBioscience)	y	y	AB_657736			n	n	n	y	y	paper	y
23290520	tomato lectin FITC (Vector Labs	y	n				n	n	n	y	n	paper	y
23273845	CD3 (clone: 145-2C11)	n	n				n	n	n	y	y	sup data	n
23273845	CD4 (clone: GK1.5)	n	n				n	n	n	y	y	sup data	n
23273845	CD11c (clone: N417)	n	n				n	n	n	y	y	sup data	n
23273845	CD19 (clone: 6D5)	n	n				n	n	n	y	y	sup data	n
23273845	CD36 (clone: HM36)	n	n				n	n	n	y	y	sup data	n
23314004	anti-CD8α; 53-6.7	n	n				n	n	n	y	y	sup data	n
23314004	anti-CD4 (RM4-5)	n	n				n	n	n	y	y	sup data	n
23314004	anti-CD44 (IM7)	n	n				n	n	n	y	y	sup data	n
23314004	anti-CD11b (M1/70)	n	n				n	n	n	y	y	sup data	n
23314004	anti-CD103 (2E7)	n	n				n	n	n	y	y	sup data	n
23291597	APC–anti-CD8 (clone 2.43)	n	n				n	n	n	y	y	sup data	n
23291597	FITC–anti-CD11c (clone HL3)	y	y	many AR IDs			n	n	n	y	y	sup data	y
23291597	APC–anti-CD31 (clone MEC 13.3)	y	n				n	n	n	y	y	sup data	y
23291597	PE-Cy5–anti-B220 (clone RA3-6B2)	y	n				n	n	n	y	y	sup data	y
23291597	PerCP-Cy5.5–anti-CD62L (clone MEL-14)	y	n				n	n	n	y	y	sup data	y
23263557	ABCF1-HA	n	n				n	n	n	n	n	sup data	n
23263556	anti-CD4; GK1.5	n	n				n	n	n	y	y	sup data	n
23263556	anti-CD8α (53-6.7)	n	n				n	n	n	y	y	sup data	n
23263556	anti-CD25 (PC61)	n	n				n	n	n	y	y	sup data	n
23263556	anti-CD44 (IM7)	n	n				n	n	n	y	y	sup data	n
23263556	anti-Thy-1.2 (53-2.1)	n	n				n	n	n	y	y	sup data	n
23263555	mAb to mouse C3a (I87-1162)	y	y	AB_397067			n	n	y	y	y	sup data	y
23263555	mAb to C5a (I52-1486)	y	y	AB_396992			n	n	n	y	y	sup data	y
23263555	Anti–mouse C5aR1 (20/70)	n	n				n	n	y	n	y	sup data	n
23263555	Anti–mouse B7-1 (16-10A1	n	n				n	n	y	n	y	sup data	n
23263555	anti–mouse B7-2 (GL1)	n	n				n	n	y	n	y	sup data	n
23322547	goat anti-cholera toxin	y	n				n	n	y	y	n	paper	y
23322532	rabbit anti-NGF IgG	n	n				n	n	y	y	n	paper	n
23322532	mouse anti-β actin IgG	n	n				n	n	y	y	n	paper	n
23322532	sheep anti-tyrosine hydroxylase (TH) IgG	y	y	AB_90755			n	n	y	y	n	paper	y
23322532	rabbit anti-calcitonin gene-related peptide (CGRP) IgG	y	n				n	n	y	y	n	paper	y
23322532	rabbit anti-substance P (SP) IgG	n	n				n	n	y	y	n	paper	n
23322491	NeuN antibody	y	y	multiple AR IDs			y	n	y	y	y	paper	y
23322443	rabbit anti-PHA-L	n	n				n	n	n	y	n	paper	n
23296922	mouse monoclonal (6G9) anti-CaMKIIα antibody	y	y	AB_447192			y	y	y	y	y	paper	y
23296922	rabbit anti-PHAL	n	n				n	n	n	y	n	paper	n
22736487	chicken anti-GFP	y	y				y	n	y	y	n	paper	y
22736487	rabbit polyclonal antiglycine antibody	y	y				y	n	y	n	n	paper	y
23345245	rabbit anti-Sox10	n			y	n	n	n	y			na	n
23345245	rabbit anti-GFP	n					n	n	y	n		na	n
23345245	mouse anti-BrdU	y	n				y	n	y	y	y	paper	y
23345245	mouse anti- Isl	y	y				y	n	y	n	y	paper	y
23345245	mouse anti-HuC/D	y	n				n	n	y	n	y	paper	y
23365220	4C12	y	n				n	n	y	n	y	paper	y
23365220	zpr-1	y	y				zpr-1	n	y	n	n	paper	y
23365220	GluR4	n	n				n	n	y	n	n	na	n
23365220	GluR2	n	n				n	n	y	n	n	na	n
23365220	GAD 65/67	y	y				n	n	y	n		paper	y
23365220	Ribeye-b		n			n		n	y		n	na	n
23365253	SV2	y	y				y	n	n	n	n	paper	y
23365253	anti-GFP	y	y				y	n	n	n		paper	y
23365253	4d9	y	n				y	n	n	n	n	paper	y
23365253	anti- Prox-1	y	y				y	n	n	n		paper	y
22674266	primary antibody(300 μl of 1:1000 GFP Mouse antibody, Invitrogen)	n	n				n	n	n	y	n	paper	n
23345232	rabbit anti-active caspase-3	y	y				y	n	y	n	y	paper	y
23345232	mouse anti-tyrosine hydroxylase 1	y	y				y	y	y	n	n	paper	y
23345232	rabbit anti-galanin	y	y				y	n	y	n	n	paper	y
23345232	rabbit anti--catenin	y	y				y	y	y	n		paper	y
23345232	rat anti-serotonin	y	y				y	n	y	n	n	paper	y
23345247	SV2	n	n				n	n	n	n	n	paper	n
23345247	ZNP-1	n	y		n	n	n	n	n		n	paper	n
23325262	GAD67	y	y	AB_2278725			n	n	mouse	y	n	paper	y
23325261	anti-Kv2.1 antibody	n	n				n	n	mouse	n	n	paper	n
23325261	anti-HA Alexa Fluor-594	y	y	AB_1500205			n	n	n	y	n	paper	y
20802489	monoclonal antibody Kv1.2				n	n		n	y	y	n	paper	n
23413262	alpha-actinin	n	n				n	n	n	n		na	n
23413262	alpha-tropomodulin-1	y	y				n	n	n	n	n	paper	y
23307302	Egr-2 antibody (anti-rabbit, 1:500; Santa Cruz)	y	y	AB_2097182			n	n	y	y	n	paper	y
23307302	PCNA (anti-mouse, 1:1000; Santa Cruz),	n	n				n	n	y	y	n	paper	n
23307302	TNF-a (anti-mouse, 1:500, Santa Cruz),	n	n				n	n	y	y	n	paper	n
23307302	GAPDH (anti-rabbit, 1:1000, Santa Cruz)	n	n				n	n	y	y	n	paper	n
23307302	rimary antibodies anti-NeuN (a marker of neuron, 1:600; Chemicon),	n	n				n	n	y	y	n	paper	n
23277184	MIER1a antibody		n		y	y		n	y		na	paper	y
23271141	versican polyclonal antibody produced in rabbit (Lifespan, Seattle, Washington, USA, #LS-C25140)	y	n				y	n	y	y	na	paper	y
23269505	anti-chicken aGSU antiserum diluted 1:8,000		n		y	n		n	y		na	paper	n
23269505	anti-chicken FSHb antiserum		n		y	n		n	y		na	paper	n
23269505	anti-chicken LHb anti- serum		n		y	n		n	y		na	paper	n
23269505	anti-chicken TSHb		n		y	y		n	y		na	paper	y
23269505	anti-chicken GH antibody		n		y	n		n	n		na	paper	n
23264111	anti-TIM-1 (1:100, goat IgG, R&D Systems, San Diego, CA, USA	n	n				n	n	y	y	n	paper	n
23264111	anti-TIM- 3 (1:100, goat IgG, R&D Systems)	n	n				n	n	y	y	n	paper	n
23264111	anti-TIM-4 (1:100, goat IgG, R&D Systems)	n	n				n	n	y	y	n	paper	n
23264111	anti-CD3 (1:50, clone:F7.2.38, Dako)	y	n				n	n	n	y	y	paper	y
23264111	anti-CD8 (1:50, clone: C8/144B, Dako)	n	n				n	n	n	y	y	paper	n
23315288	anti-pVHL	n	n				n	n	n	y	n	paper	n
23315288	anti-PTEN	n	n				n	n	n	y	n	paper	n
23315288	anti-AKT	n	n				n	n	n	y	n	paper	n
23315288	anti-phospho-AKT (p-AKT)	n	n				n	n	n	y	n	paper	n
23315288	nti-cleaved-PARP;	n	n				n	n	n	y	n	paper	n
23291980	mouse monoclonal anti-MT-1/2 (1:1,000; DakoCytomation	y	y	AB_2146640			n	n	y	y	n	paper	y
23291980	mouse anti-b actin antibody (1:10,000; Sigma-Aldrich, Inc.	n	n				n	n	y	y	n	paper	n
23291919	mouse anti-nestin (1:500, Abcam, UK)	n	n				n	n	y	y	n	paper	n
23291919	mouse anti-Tuj (1:500, Sigma–Aldrich, USA	n	n				n	n	y	y	n	paper	n
23291919	mouse anti-CNPase (1:500, Abcam, UK)	n	n				n	n	y	y	n	paper	n
23291919	rabbit anti-GFAP (1:2,000, Millipore, USA)	n	n				n	n	y	y	n	paper	n
23291919	mouse anti-BrdU antibody (Sigma–Aldrich, USA)	n	n				n	n	y	y	n	paper	n
23302023	nti-Alix (clone 3A9; Santa Cruz Biotechnology)	y	y	AB_673821			n	n	n	y	y	paper	y
23302023	anti-Alix (clone 1A12; Santa Cruz Biotechnology)	y	y	AB_673819			n	n	n	y	y	paper	y
23278717	anti-Xenopus Daz-like protein antibody (Mita & Yamashita 2000		n		y	y		n	n		n	paper	y
23157381	polyclonal anti-DsRed antibody	n	n				n	n	n	n		na	n
23350700	rabbit anti-calretinin	y	y				y	n	y	n		paper	y
23072729	a-Acetylated Tubulin	y	y				y	n	n	n	n	paper	y
23211737	Phospho-p53 9284 Cell Signaling 1:200	y	y	multiple, because there are multiple catalog numbers			y	n	n	y	n	paper	y
23211737	Sf3b14 AP48076 AbGent 1:200	y	n				n	n	n	y	n	paper	y
23211737	Sf3b1(SAP155) ab39578 abcam 1:200	y	y	AB_2186512			y	n	n	y	n	paper	y
23211737	Pol II phosphoS2 ab5095 abcam 1:200	y	y	AB_304749			y	n	n	y	n	paper	y
23211737	Rpl7l1 16707–1-AP Proteintech Group 1:200	y	n				y	n	n	y	n	paper	y
23199370	pACC primary antibody (1:250, Cell Signaling	y	y	AB_2288840			n	n	n	y	n	paper	y
23199370	nti-ACC1 antibody (1:250; Cell Signaling)	n	n				n	n	n	y	n	paper	n
23186935	anti-HA antibody (Santa Cruz Biotechnology)	n	n				n	n	n	y	n	paper	n
23174120	anti-5-MeC antibodies (Epigentek Group Inc., USA)	y	n				n	n	n	y	n	paper	y
23021200	anti-TINAGL1 polyclonal antibody (diluted 1:200), which was prepared as described previously (Li et al., 2007),		n		y	y	n	n	y		n	paper	y
23021200	rabbit anti-fibronectin polyclonal antibody (diluted 1:50; Sigma)	n	n				n	n	y	y	n	paper	n
23021200	rabbit anti-collagen type IV polyclonal antibody (diluted 1:50; Chemicon)	n	n				n	n	y	y		paper	n
23298866	anti-CD3-PerCP-Cy5.5	y	n				n	n	n	y	n	paper	y
23298866	anti-CD4-PECy7	n	n	AB_1659697 or AB_1659695			n	n	n	y	n	paper	n
23298866	anti-CD25-PE	y	y	AB_465606			y	n	n	y	n	paper	y
23298866	anti-Foxp3-APC	y	y	AB_469456			n	n	n	y	n	paper	y
23298866	anti-IL-17-APC	y	y	AB_763580			n	n	n	y	n	paper	y
23298865	Duoset ELISA development kit (R&D Systems) to quantify bovine TNF-a	y	y	multiple			y	n	y	y	n	paper	y
23298864	IL-6	n	n				n	n	n	y	n	paper	n
23298864	TNF-a	n	n				n	n	n	y	n	paper	n
23298864	IL-10	n	n				n	n	n	y	n	paper	n
23261832	FITC-anti-CD3	n					n	n	n	y	n	paper	n
23261832	PE-anti-CD4	n	n				n	n	n	y	n	paper	n
23261832	PerCP-anti-CD8	n	n				n	n	n	y	n	paper	n
23261832	PEcy5.5-anti-CD3	y	n				y	n	y	y	y	paper	y
23261832	FITC-anti-CD4	n	n				n	n	n	y	n	paper	n
23261831	fluorescein isothiocyanate (FITC)-conjugated armenian hamster anti-mouse FceRI monoclonal antibody	y	n				n	n	y	y	n	paper	y
23261831	phycoerythrin (PE)-conjugated rat anti-mouse CD117 (c-Kit) monoclonal antibody	n	n				n	n	y	y	n	paper	n
23298344	CD14 (FITC/fluorescein isothiocyanate, clone RMO52, isotype IgG2a)	y	y	AB_130992			n	n	y	y	y	paper	y
23298344	CD16 (FITC, clone 3B8, isotype IgG1)	y	n				n	n	y	y	y	paper	y
23298344	CD33 (PC5/ phycoerythrin-cyanin-5, clone D3HL60.251, isotype IgG1)	y	y	AB_131163			n	n	n	y	y	paper	y
23298344	CD45 (PC7/ phycoerythrin-cyanin-7, clone J.33, isotype IgG1)	y	n				n	n	n	y	y	paper	y
23298344	CD85k (PE/ phycoerythrin, clone ZM3.8, isotype IgG1)	n	n				n	n	n	y	y	paper	n
23298316	anti- CD14-PE	n	n				n	n	n	y	n	paper	n
23298316	anti-CD86-FITC	n	n				n	n	n	y	n	paper	n
23298316	anti-CD83-APC	y	n				n	n	n	y	n	paper	y
23298316	anti-CD80-PE	y	y	multiple IDs			n	n	n	y	n	paper	y
23298316	anti-HLA-DR-FITC	n	n				n	n	n	y	n	paper	n
23298273	NKG2A-PE	n	n				n	n	n	y	n	paper	n
23298273	CD8-PC5	y	y	AB_131157			n	n	n	y	n	paper	y
23298273	NKG2D-PE	n	n				n	n	n	y	n	paper	n
23298273	MICA-PE	y	y	AB_494093			n	n	n	y	n	paper	y
23298273	ULBP-1-PE	n	n				n	n	n	y	n	paper	n
23298254	goat anti-human CCR2 antibody	n	n				n	n	n	y	n	paper	n
23298254	mouse anti-human CD14 antibody	n	n				n	n	n	y	n	paper	n
23298254	CD14- PerCP-Cy5.5 (clone: M5E2)	y	y	AB_2033939			n	n	y	y	y	paper	y
23298254	CD16-PE (clone: 3G8	y	y	many IDs			n	n	y	y	y	paper	y
23298254	CCR2-Alexa Fluor 647 (clone: 48607)	y	y	647150			n	n	y	y	y	paper	y
23298196	anti-CD4	n	n				n	n	n	y	n	paper	n
23298196	anti-CD8	n	n				n	n	n	y	n	paper	n
23298196	IL-4	n	n				n	n	n	y	n	paper	n
23298196	IFN-γ	n	n				n	n	n	y	n	paper	n
23298196	CD4	n	n				n	n	n	y	n	paper	n
20669363	Kv. 1.2 mouse antibody				n	n		n	n	y	n	paper	n
23262469	Rabbit polyclonal antibodies against human von Willebrand factor (vWF)	n	n				n	n	y	y	n	paper	n
23262469	A mouse mono- clonal antibody blend (anti-A BioClone; Ortho, Raritan, New Jersey, USA)	n	n				n	n	y	n	n	paper	n
23262469	anti-H mouse monoclonal (BRIC231; Santa Cruz Biotechnolo- gies, Santa Cruz, California, USA [11])	y	y	AB_2231093			n	n	y	y	n	paper	y
23262504	anti-Ngb polyclonal rabbit antibody (sc- 30144; Santa Cruz Biotechnology, Santa Cruz, California, USA)	y	y	multiple			y	n	y	y	n	paper	y
23274702	rabbit anti-Nestin polyclonal antibody (anti-Nestin, 1:500; Chemicon, Temecula, California, USA)	n	n				n	n	y	y	n	paper	n
23274702	mouse anti-b-tubulin III monoclonal antibody (anti-b-tubulin III, 1 : 100; Chemicon)	n	n				n	n	y	y	n	paper	n
23274702	rabbit anti-GFAP polyclonal antibody (anti-GFAP, 1:200; Chemicon)	n	n				n	n	y	y	n	paper	n
23274702	mouse anti-CNPase monoclonal anti- body (anti-CNPase, 1 : 200; Chemicon)	n	n				n	n	y	y	n	paper	n
23282990	AKP	n	n				n	n		n	n	paper	n
23282990	Oct3/4	n	n				n	n		n	n	paper	n
23282990	SSEA-1	n	n				n	n		n	n	paper	n
23282990	a-SMA	n	n				n	n		n	n	paper	n
23282990	AFP	n	n				n	n		n	n	paper	n
23305954	anti-cleaved caspase-3	n	n				n	n	y	y	n	paper	n
23305954	anti-BrdU	n	n				n	n	y	y	n	paper	n
23305954	anti-DTA	n	n				n	n	y	y	n	paper	n
23305954	anti-GAD67	y	y	multiple			n	n	y	y	n	paper	y
23305954	anti-GAD67	n	n				n	n	y	y	n	paper	n
23257508	anti-TACE antibody	n	n				n	n	n	n	n	paper	n
23257508	anti-APP antibody	n	n				n	n	n	n	n	paper	n
23257508	anti-actin	n	n				n	n	n	n	n	paper	n
23228673	chicken anti-GFP	y	y	AB_300798			y	n	y	y	n	paper	y
23228673	goat anti-NQO1	y	y	AB_302995			y	n	y	y	n	paper	y
23228673	rabbit anti-Keratin5	y	n				y	n	y	y	n	paper	y
23228673	goat anti-Sox2	y	y	AB_355110			y	n	y	y	n	paper	y
23228673	rabbit anti-GAP43	y	y	2 AR IDs			y	n	y	y	n	paper	y
23201176	pAkt-S473	n	n				n	n	n	y	n	paper	n
23201176	pAkt-T308	n	n				n	n	n	y	n	paper	n
23201176	Akt(pan	n	n				n	n	n	y	n	paper	n
23201176	GR	n	n				n	n	n	y	n	paper	n
23201176	B-actin	n	n				n	n	n	y	n	paper	n
23154073	rabbit anti-EGFP	n	n				n	n	y	y	n	paper	n
23154073	mouse anti-GABA	y	y	AB_94396			y	n	y	y	n	paper	y
23154073	anti-CaMKII	y	y	AB_447192			y	n	y	y	n	paper	y
23107604	monoclonal mouse anti-CD	y	y				n	n	y	n	n	paper	y
23107604	monoclonal anti-tubulin	n	n				n	n	y	n	n	na	n
23286511	VEGF-A	n	n	n			n	n	n	y	n	paper	n
23286511	β1-AR	n	n	n			n	n	n	y	n	paper	n
23286511	β2-AR	n	n	n			n	n	n	y	n	paper	n
23286511	phospho-ERK (Thr202/Tyr204)	y	y	AB_2139990			n	n	n	y	n	paper	y
23286511	ERK	n	n	n			n	n	n	y	n	paper	n
23253261	anti-Mfn1 (Protein Tech),	n	n	n			n	n	n	y	n	paper	n
23253261	anti-Cyclin B11,	n	n	n			n	n	n	y	n	paper	n
23253261	anti-ubiquitin	n	n	n			n	n	n	y	n	paper	n
23253261	anti-c-Myc (Santa Cruz Biotechnology) antibodies.	n	n	n			n	n	n	y	n	paper	n
22985877	goat polyclonal antibody to human ninein Santa Cruz Biotechnology,Inc., cat.no. sc-50142 and	y	y	AB_2153533			y	n	y	y	na	paper	y
22985877	rabbit polyclonal antibody to human γ- tubulin sc-10732	y	y	AB_2211260			y	n	y	y	na	paper	y
22985877	rabbit polyclonal antibody to human pericentrin (cat.no. ab4448, AbCam, Cambridge, UK).	y	y	AB_304461			y	n	y	y	na	paper	y
22985877	anti- titin monoclonal antibody MAb Tit1 5 H1.1		n		y	y		n	n		n	paper	y
22985877	MAb Tit1 5 H1.1		n		y	y		n	y		y	na	y
23378677	Prox1	y	n				y	n	y	n	n	paper	y
23267846	mouse anti-Bassoon monoclonal antibody (1:200, Enzo Life Sciences,	y	y	AB_2038857			n	n	y	y	n	paper	y
23246669	rabbit polyclonal antibody against BDNF (1:100; Abcam, Cambridge,	n	n				n	n	y	y	n	paper	n
23246669	mouse monoclonal antibody against Thy1.1 (1:100; Millipore,	n	n				n	n	y	y	n	paper	n
23246669	rabbit polyclonal antibody against IGF-I (1:100; Labvision,	n	n				n	n	y	y	n	paper	n
23246669	rabbit polyclonal antibody against nestin (1:200; Millipore)	n	n				n	n	y	y	n	paper	n
23246669	5-bromo-2′-deoxyuridine (BrdU; 10 μM; Millipore)	n	n				n	n	n	y	n	paper	n
23159779	Anti-DmCpx antiserum (1:500) (Huntwork and Littleton, 2007)		n		y	n		n	n		na	paper	n
23147113	Pak1 (CST)	y	y	AB_330222			n	n	n	y	na	paper	y
23147113	Nck (BD),	y	y	AB_397505			n	n	n	y	na	paper	y
23147113	anti-T7 epitope (Novagen)	n	n				n	n	n	y	n	paper	n
23147113	anti-M2 Flag epitope (Sigma),	n	n				n	n	n	y	n	paper	n
23147113	anti-Myc (MBL),	n	n				n	n	n	y	n	paper	n
23192979	rabbit antihuman Fibronectin IgG	n	n		y	y		n	y		n	na	n
22865660	PKCα	y	n				y	n	y	y		supplement	y
22865660	GFP/YFP/Citrine	y	n				n	n	y	y	y	supplement	y
22865660	DsRed/mCherry	y	n				y	n	y	y	y	supplement	y
22888055	HuC	y	y				y	n	n	n	n	paper	y
22888055	anti-PH3	n	n				y	n	n	n	n	na	n
22888055	anti-Zrf-1	y	y				y	n	n	n	n	paper	y
22648905	anti-GFP IgG	n	n				n	n	n	y	n	na	n
23124967	anti-histidine	n	n				n	n	n	n	n	na	n
23124967	anti-a-tubulin	n	n				n	n	n	n	n	na	n
23070877	BDNF	y	n	AB_90748			y	n	n	n		paper	y
23070877	TrkB	y	y	AB_632557			y	n	n	y		paper	y
23312859	Anti-STAT3	n					n	n	n	n	n	paper	n
23312859	anti-myc (9E10)	y	y	AB_627268			n	n	n	y	y	paper	y
23312859	anti-phospho-STAT3 (Y705)	n	n				n	n	n	y	n	paper	n
23312859	a-tubulin Ab (B5-1-2)	y	y	AB_477579			n	n	n	y	y	paper	y
23312859	Anti-hIL-21 mAb (4BG1)		n		y	y			y		y	paper	y
11449355	monoclonal rabbit-anti-human antibodies against PRMT1	y	y	4 AR IDs			n	n	y	y	y	paper	y
11449355	monoclonal rabbit-anti-human antibodies against PIAS1	y		AB_1904090			n	n	y	y	y	paper	y
11449355	mouse-anti-human-pY701-STAT1	y	n				n	n	y	y	y	paper	y
23294974	mouse phosphorylated p38MAPK antibody (diluted with 5% BSA in TBST at a ratio of 1:400; numbers sc-166182, Santa cruz	y	y	AB_2141746			y	n	y	y	n	paper	y
23294974	GAPDH antibodies	n	n				y	n	n	y	n	paper	n
23294974	ats monoclonal antibodies to Tyr705 phosphorylated (p)STAT3 (1:1000 dilution for each antibody, numbers sc-169154, Santa cruz	n	n	Author reported a catalog number for different antibody; ribosomal protein L23a			y	n	y	y	n	paper	n
23294974	rats IgG monoclonal antibody to STAT3 (1:1000 dilution, numbers sc-174121, Santa cruz	n	n	Not in ABR or at santa cruz			y	n	y	y	n	paper	n
23290865	FITC-labeled anti-mouse CD3e	n	n				n	n	n	y	n	paper	n
23290865	PE-labeled anti-mouse CD3e	n	n				n	n	n	y	n	paper	n
23290865	PE-Cy7-labeled anti-mouse CD4	n	n				n	n	n	y	n	paper	n
23290865	APC-Cy7-labeled anti-mouse CD8a	n	n				n	n	n	y	n	paper	n
23290865	PerCP-Cy5.5-labeled anti-mouse CD8b	n	n				n	n	n	y	n	paper	n
23323935	anti-mouse FcγRII/III mAb (clone 2.4G2; BD Biosciences)	n	n				n	n	n	y	y	paper	n
23323935	phycoerythrin (PE)-labeled anti-CD11c mAb	y	y	AB_313776			n	n	n	y	y	paper	y
23323935	fluorescein isothiocyanate (FITC)-labeled anti-CD11c mAb	y	y	AB_313774			n	n	n	y	y	paper	y
23323935	PE-Cy5-labeled anti-F4/80 mAb	y	y	AB_893494			n	n	n	y	n	paper	y
23323935	FITC-anti-CD3 mAb	y	y	AB_312660			n	n	n	y	n	paper	y
23320737	Sca-1	n	n				n	n	n	n	n	paper	n
23320737	c-kit	n	n				n	n	n	n	n		n
23320737	CD3e	n	n				n	n	n	n	n		n
23320737	CD4	n	n				n	n	n	n	n		n
23320737	CD8a	n	n				n	n	n	n	n		n
23317140	Phycoerythrin (PE)/indotricarbocyanine (Cy7)-conjugated anti-mouse CD8a (clone 53-6.7)	y	y	312760			n	n	n	y	y	paper	y
23317140	biotin-conjugated anti-mouse CD122 (clone 5H4)	y	y	AB_313226			n	n	n	y	y	paper	y
23317140	PE-conjugated anti-mouse PD-1 (clone 29F.1A12)	y	y	AB_1877232			n	n	n	y	y	paper	y
23317140	PE-conjugated anti-mouse TCR Vβ13 (clone MR12-4)	y	n				n	n	n	y	y	paper	y
23317140	PE-conjugated anti-mouse CD49d	y	y	AB_396504			n	n	n	y	y	paper	y
23311955	CD4 (RM4-5)	n	n				n	n	n	n	n	paper	n
23311955	CXCR5 (2G8)	n	n				n	n	n	n	n	paper	n
23311955	PD-1 (29F.1A12)	n	n				n	n	n	n	n	paper	n
23311955	ICOS (C398.4A	n	n				n	n	n	n	n	paper	n
23290865	CD8α (53-6.7)	n	n				n	n	n	n	n	paper	n
23290865	CD4 (GK1.5)	n	n				n	n	n	n	n	paper	n
23290865	CD62L (MEL-14)	n	n				n	n	n	n	n	paper	n
23290865	CD45.2 (104)	n	n				n	n	n	n	n	paper	n
23290865	CD44 (IM7)	n	n				n	n	n	n	n	paper	n
23318105	anti-human CD64 mAb	n	n				n	n	n	y	n	paper	n
23318105	FITC-conjugated goat polyclonal IgG F(ab′)2 anti-human IgM (ABR, CO, USA)	n	n				n	n	y	y	n	paper	n
23313381	Anti-nAChR α3 subunit	y	y	multiple			y	n	y	y	n	paper	y
23313381	Anti-nAChR β4 subunit	y	n				y	n	y	y	n	paper	y
23313381	Anti-nAChR	y	y	multiple			y	n	y	y	n	paper	y
23305745	CD4-Percp	n	n				n	n	n	y	n	paper	n
23305745	CXCR5-Alexa 647	y	n				n	n	n	y	n	paper	y
23305745	CD45RO-FITC	y	y	AB_395883			n	n	n	y	n	paper	y
23305745	ICOS-PE,	n	n				n	n	n	y	n	paper	n
23305745	PD-1 PE-Cy7	y	n				n	n	n	y	n	paper	y
23294897	CD3	n	n				n	n	n	y	n	paper	n
23294897	CD4	n	n				n	n	n	y	n	paper	n
23294897	CD8	n	n				n	n	n	y	n	paper	n
23294897	B220	n	n				n	n	n	y	n	paper	n
23294897	CD11b	n	n				n	n	n	y	n	paper	n
23290828	anti-S1P1	n	n				n	n	y	y	n	paper	n
23290828	anti-S1P2	n	n				n	n	y	y	n	paper	n
23290828	anti-S1P3	n	n				n	n	y	y	n	paper	n
23290828	rabbit polyclonal anti-mouse BDNF antibodies (sc-546; Santa Cruz Biotechnology, USA)	y	y	AB_630940			y	n	y	y	n	paper	y
23290828	rabbit poly- clonal anti-mouse GDNF antibodies (sc-328; Santa Cruz),	y	n	AB_2247684			y	n	y	y	n	paper	y
23321541	rabbit polyclonal anti-GFAP (1:1500 dilution, Dakocytomation, Gostrup, Denmark, cat.# Z 334	y	y	AB_10013382			y	n	y	y	n	paper	y
23321541	anti-rabbit monoclonal CREB-1 (1:500 dilution, Zymed, South San Francisco, California, cat# 35-0900)	y	y	AB_87220			y	n	y	y	n	paper	y
23321541	mouse monoclonal anti-GAP-43 (1:5000 dilution, Sigma- Aldrich , Saint Louis, Missouri, cat # G 9264)	y	y	AB_477034			y	n	y	y	n	paper	y
23321539	rabbit anti-tyrosine hydroxylase (TH) antibody 7 (1:500; Chemicon International, Temecula, CA, USA)	n	n				n	n	y	y	n	paper	n
23321539	rabbit anti-glial fibrillary 8 acidic protein (anti-GFAP) antibody (1:500; Dako, Glostrup, Denmark)	n	n				n	n	y	y	n	paper	n
23321539	mouse anti-S100β antibody (1:500; Sigma-Aldrich)	n	n				n	n	y	y	n	paper	n
23321539	goat anti-cathepsin D antibody (1:50; Santa Cruz Biotechnology, Santa Cruz, CA, USA)	n	n				n	n	y	y	n	paper	n
23321539	abbit anti-phospho-SAPK/c-Jun N-terminal kinase (JNK) (1:1000 Thr183/Tyr185, 9251; Cell Signaling Technology,	y	y	AB_331659			y	n	y	y	n	paper	y
23313710	Rabbit anti‐phosphoERK1/2 protein, was obtained from Neuromics	n	n				n	n	y	y	n	paper	n
23313710	rabbit anti‐BDNF antibody was obtained from Millipore	n	n				n	n	y	y	n	paper	n
23313709	anti-phospho-CaMKII (1:5000; Fukunaga et al.,1988		n		y	n			y			paper	n
23313709	anti-CaMKII (1:5000; Fukunaga et al., 1988)		n		y	n			y			paper	n
23313709	anti-phospho-DARPP-32 (Thr-34) (1:1000; Imgenex, San Diego, CA, USA)	y	y	AB_316772			n	n	n	y		paper	y
23313709	anti-DARPP-32 (1:1000; Millipore	y	n				n	n	n	y	n	paper	y
23313709	anti-NR1 (1:1000; Cell Signaling	y	y	AB_1904067			n	n	n	y	n	paper	y
23325260	anti-CNTFR􏰉 antiserum “3X”				y	y			y			paper	y
23325260	goat anti-rat CNTF	n	n				n	n	y	y	n	paper	n
23325260	goat anti-rat CNTFR􏰉	y	y	2 AR IDs			n	n	y	y	n	paper	y
23325260	rabbit anti-human/mouse caspase 3 active (R&D Systems)	y	y	2 AR IDs			n	n	y	y	n	paper	y
23325258	monoclonal mouse anti-GAD67 antibody (1:250; Milli- pore)	y	y	multiple			n	n	y	y	n	paper	y
23325258	􏰊-actin	n	n				n	n	n	n	n	paper	n
23325258	goat anti-GABAAR 􏰉4	n	n				n	n	y	y	n	paper	n
23325258	rabbit anti-GABAAR 􏰐 (1:100; Santa Cruz Biotechnology)	n	n				n	n	y	y	n	paper	n
23325254	chicken 􏰉-GFP (1:500; Aves Labs)	n	n				n	n	y	y	n	paper	n
23325254	mouse 􏰉-NeuN (1:100; Millipore)	n	n				n	n	y	y	n	paper	n
23325254	goat 􏰉-SOX2 (1:500; Santa Cruz Biotechnology)	n	n				n	n	y	y	n	paper	n
23325254	mouse 􏰉-GFAP (1:500; Sigma)	y	y	AB_477010			n	n	y	y	n	paper	y
23325254	goat 􏰉-Doublecortin (DCX) (1:250; Santa Cruz Biotechnology)	n	n				n	n	y	y	n	paper	n
23219907	rabbit anti- TH Ab	n	n				n	n	y	n		na	n
23106570	rabbit anti-MVP	n	n				n	n	y	n	n	na	n
23106570	mouse anti-Islet-1	n	n				n	n	y	n		na	n
23106570	mouse anti-tyrosine hydroxylase	n	n				n	n	y	n		na	n
23106570	Rabbit anti-nestin	n	n				n	n	y	n		na	n
23106570	mouse anti-synaptic vesicle protein 2	y	y				n	n	y	n		paper	y
23106570	mouse anti-GAPDH	n	n				n	n	y	n	n	na	n
17996088	Rat anti-BrdU	y	y	AB_323427			y	n	y	y	n	paper	y
17996088	Rabbit anti-Calbindin (CB)	y	y	AB_2068336			y	n	y	y	n	paper	y
17996088	Goat anti-Calretinin (CR)	y	y	AB_634545			y	n	y	y	n	paper	y
17996088	Mouse anti-GABA	y	y	AB_476667			y	n	y	y	n	paper	y
17996088	Mouse anti-N-copine (NC)	n	n				y	n	y	y	n	paper	n
23184466	parvalbumin7 mouse monoclonal antibody	n	n		n	n	n	n	y		n	na	n
23043290	mouse monoclonal primary antibody produced against human antigen	n	n		n	y	n	n	y		n	na	n
23043290	Osteocalcin rabbit polyclonal primary antibody		n		y	y		n	y			paper	n
23043290	Collagen type II an anti-chicken mouse antibody	y	n				y	n	y	y	n	paper	y
10879655	Rabbit polyclonal anti mouse PKCδ (C-17, Santa Cruz Biotechnology)	y	y	2 AR IDs (b/c there are 2 catalog #s)			n	n	y	y	n	paper	y
23289785	mouse anti- Achaete (1:5, Developmental Studies Hybridoma Bank)	y	y	AB_528066			y	n	y	y	n	paper	y
23289785	rabbit anti-Asense (1:10, gift of A. Brand)		n		y	n			y			paper	n
23289785	Rabbit anti- Commisureless (1:50 gift of G. Tear)		n			n			y			paper	n
23289785	Mouse anti-Fasciclin II (1:4, Developmental Studies Hybridoma Bank 1D4)	y	y	AB_528235			y	n	y	y	n	paper	y
23289785	mouse anti-Slit (1:10, Developmental Studies Hybridoma Bank C555.6D)	y	y	AB_528470			y	n	y	y	n	paper	y
23217079	mouse anti-β- Galactosidase (1:300) (Z378A, Promega, WI, USA)	y	n				y	n	y	y	n	paper	y
23217079	mouse anti-Gurken (1D12) (1:50)	y	y	AB_528273			y	n	y	y	n	paper	y
23217079	mouse anti-Broad-core (25E9.D7) (1:100)	y	y	AB_528104			y	n	y	y	n	paper	y
23217079	mouse anti-Hnt (1:100)	n	n				n	n	y	n	n	paper	n
23217079	mouse anti-Cut (1:100) (Developmental Studies Hybridoma Bank, IA, USA)	y	y	AB_528186			n	n	y	y	n	paper	y
23313141	rabbit polyclonal anti-FAK		n		y	y			y			paper	y
23313141	rabbit polyclonal to GAPDH	n	n				n	n	y	n		paper	n
23238120	rabbit anti-cleaved Caspase 3 (Asp175) (1:200, Cell Signaling)	y	y	multiple, several different cat #s			n	n	y	y	n	paper	y
23238120	rat anti-BrdU [BU1/75 (ICR1)] (1:200, Abcam)	y	y	AB_305426			n	n	y	y	y	paper	y
23238120	mouse anti-b-gal (1:500, Promega)	y	y	AB_430877			n	n	y	y	n	paper	y
23085574	Rabbit anti-G-ia65A		n		y	n			y			paper	n
23085574	rabbit anti-Ga49B		n		y	n			y			paper	n
23085574	rabbit anti- Zipper (MyoII heavy chain)		n		y	n			y			paper	n
23085574	mouse anti-DE-Cad (DSHB)	y	y	AB_528120			n		y	y	n	paper	y
23085574	rabbit anti-Gb13F		n		y	y			y			paper	y
23059197	rabbit anti-mouse DLK1 primary antibody (sc-25437; Santa Cruz Bio- technology, Santa Cruz, CA, USA)	y	y	AB_2292943			y	n	y	y	n	paper	y
23059197	primary antibody (guinea pig anti-rat GH, National Hormone and Peptide Program, Torrance, CA, USA	y	n				n	n	y	y	n	paper	y
23336074	rabbit polyclonal anti-Prox1	y	y				n	n	y	n		paper	y
23336074	guinea pig polyclonal anti-Pdx1		n		y	n	n	n	y			paper	n
23336074	mouse monoclonal anti-MYC	n	n				n	n	y	n	n	na	n
23007696	anti-S100P	y	y				n	n	y	n		paper	y
23007696	anti-actin	n	n				n	n	y	n	n	na	n
23007696	anti-VCAN	n	n				n	n	n	n	n	na	n
23007696	anti-SFN	n	n				n	n	n	n	n	na	n
23295741	TH	n	y		y	y	n	n	y		n	paper	y
23295741	LH	n	n		n	y	n	n	y			na	n
23231968	human b-actin	n	n				n	n	n	y	n	na	n
23231968	ICAM-1	n	n				n	n	n	n	n	na	n
23231968	VCAM-1	n	n				n	n	n	n	n	na	n
23231968	CD62E	n	n				n	n	n	n	n	na	n
21602912	rabbit anti-GFP antibody	n	n				n	n	y	y	n	paper	n
23087022	primary rabbit anti-human CARP VIII	y	y				y	n	y	y	n	paper	y
23108159	Anti-slow muscle myosin heavy chain antibody F59	y	y	AB_528373			y	n	n	n	y	paper	y
23108159	anti-b-dystroglycan antibody	y	y	AB_442043			y	n	n	n	n	paper	y
23197652	anti-phosphorylated-AKT	n	n				n	n	n	n		na	n
23197652	anti-AKT	n	n				n	n	n	n		na	n
23059813	anti-GFP	n	n				n	n	n	n	n	na	n
22843140	anti-GFP	n	n				n	n	n	n		na	n
22843140	anti-Na?/K?-ATPase	y	y				n	n	y	y	y	paper	y
23159952	anti-DSred	n	n				n	n	n	n	n	na	n
23159952	anti-col2	y	n				y	n	n	n	n	paper	y
23159952	anti- GFP	n	n				n	n	n	n	n	na	n
23159952	anti-digoxigenin-rhodamine	n	n				n	n	n	n	n	na	n
23349637	PCNA	n	n				n	n	y	n	n	na	n
23349637	53BP1	n	n				n	n	n	n		na	n
23349637	PLZF	n	n				n	n	n	n		na	n
23349637	anti-Tp53	y	y				y	n	n	y		paper	y
23302694	Living Colors anti-DsRed polyclonal antibody	y	y				y	n	n	n		supplement	y
23378909	polyclonal anti-PH3	n	n				n	n	n	n		na	n
23378909	Mouse monoclonal anti-Pax7	y	n				y	n	y	n	n	supplement	y
23378909	Anti-mouse dystrophin	n	n				n	n	y	n		na	n
23378909	The actin primary antibody (1:7500, 4 MAB1501R; Millipore,	y	y	AB_94235			y	n	n	n	n	supplement	y
23174774	polyclonal antibody against zebrafish CA XVb protein		n			y			y			paper (new AB)	y
23174774	anti-GST-tag MAbs	n	n				n	n	n	n	n	na	n
22907836	DDDDK tag antibody (ab21536, Abcam, Cambridge,	y	y	AB_446355			y	n	n	n		paper	y
23266606	Anti-b-catenin	n	n				n	n	n	n	n	na	n
23184941	phosphorylated ERK1/2	n	n		n	n		n	n		n	na	n
23184941	total ERK1/2	n	n		n	n		n	n		n	na	n
23184941	tubulin	n	n		n	n		n	n		n	na	n
23229546	anti-green fluorescent protein mouse IgG2a	y	y				n	n	y	y	y	paper	y
23229546	rabbit DsRed polyclonal	y	y				n	n	y	n		paper	y
23166330	anti-tyrosine hydroxylase (TH)	n	n				n	n	y	n	n	na	n
23166330	anti-STIL		n		y	n	n	n	y		n	paper	n
23166330	anti-Sufu	n	n				n	n	y	n	n	na	n
23166330	anti-actin	n	n				n	n	y	n		na	n
23292650	Lxrα	n	n		n	n	n	n	n		n	na	n
23292650	Lxrβ,	n	n		n	n	n	n	n		n	na	n
23292650	Src-1	n	y		y	n	n	n	n			supplement	n
23292650	p300	n	n		n	n	n	n	n		n	na	n
23292650	N-CoR	n	y		y	n	n	n	n			supplement	n
23292650	TuJ1	y	y				y	n	n	n		supplement	y
23292650	TH	y	y				y	n	n	n		supplement	y
23292650	TH	y	y				y	n	n	n	n	supplement	y
23292650	BrdU	y	y				y	n	n	n	n	supplement	y
23292650	Islet1	n	n				n	n	n	n	n	na	n
23292650	GFAP	n	y				y	n	n	n		supplememt	n
23292650	GABA	y	y				y	n	n	n		supplememt	y
23292650	5HT	y	y				y	n	n	n		supplememt	y
23292650	Brn3a	y	y				y	n	n	n	n	supplememt	y
23292650	cleaved caspase-3	y	y				y	n	n	n		supplememt	y
23292650	FoxA2	y	n				y	n	n	n	n	supplememt	y
23292650	Pitx3	y	y				y	n	n	n	n	supplememt	y
23292650	Nurr1	y	y				y	n	n	n		supplememt	y
23292650	Nkx6.1	y	y				y	n	n	n		supplememt	y
23292650	Lmx1a		n		n	n	n	n	n		n	na	n
23292650	TH	y	y				y	n	n	n	n	supplement	y
23201900	Rabbit anti- SREBP1	y	y				y	n	y	n	n	supplement	y
23201900	mouse antitubulin	y	y				y	n	y	n	n	supplement	y
22947103	anti-H3K9Ac	n	n				n	n	n	n	n	na	n
23324648	primary antibodies for calcitonin gene-related peptide (CGRP) (rabbit, 1 : 500; Biomol International LP, Plymouth Meet- ing, Pennsylvania, USA)	n	n				n	n	y	y	n	paper	n
23324648	peripherin (goat, 1:100; Santa Cruz Biotechnology Inc., Santa Cruz, California, USA)	n	n				n	n	y	y	n	paper	n
23324648	neurofilament 200kDa (rabbit, NF200; 1:500; Chemi- con, Temecula, California, USA)	n	n				n	n	y	y	n	paper	n
23324648	langerin (goat, 1 : 1000; Santa Cruz Biotechnology Inc.)	n	n				n	n	y	y	n	paper	n

## Sheet: Cell lines
PMID	Cell line name	Commercial (c) or Lab-modified (l)	Is the source of the cell line specified (commercial or non-commercial)	If public or commercial, is it identifiable in a relevant database or vendor site?	If obtained from non-commercial source, is a reference/source identifiable?	Catalog number	Source organism	Transgenic gene (source organism and gene identifiable)	anatomical structure	If uniquely identifiable, is the info in the paper or supplementary data?	Uniquely identifiable
23334421	human osteosarcoma U2OS cells	c	n	n		n	y		y	online methods	n
23334421	IMR90 cells	c	n	n		n	y		y	online methods	n
23334421	HCT116 cells	c	n	n		n	y		y	online methods	n
23334421	HCT116 cells stably overexpressing wild-type malic enzymes	l	n	n		n	y	n	y	online methods	n
23334421	HCT116 cells stably overexpressing mutant malic enzymes	l	n	n		n	y	n	y	online methods	n
23172145	N2A cells	c	n		n		y		y	online methods	n
23172145	HEK293T	c	n	n		n	y		y	online methods	n
23329048	HEK293T cells	c	n	n		n	y		y	sup	n
23226106	S2R+ cells	c	n	n		n	y		y	paper	n
23285115	DT40 chicken B-cells	c		y		n	y		y	materials and methods	n
23313552	HeLa cells	c	n	n		n	y		y	sup	n
23313552	N2A cells	c	n	n		n	y		y	sup	n
23313552	HEK293T	c	n	n		n	y		y	sup	n
23313552	MEFs	c	n		n		y		y	sup	n
23313552	ARPE19	c		n		n	y		y	sup	n
23273991	293T cells	c	n			n	y		y	sup	n
23260147	293T cells	c	n	n		n	y		y	sup	n
23321642	human mammary carcinoma cell line HMLE	c	y		y		y		y	paper	y
23321642	HMLEtwist	l	y		y		y	n	y	paper	y
23321642	Stable fluorescent mouse mammary cancer 4T-1 cells (GFP)	l	y		y		y	y	y	paper	y
23321642	Stable fluorescent b16 (GFP) mouse melanoma cell line	l	y		y		y	y	y	paper	y
23321642	HMLEtwistKNcx43	l	y		y		y	y	y	paper	y
23321641	MCF10A cell lines	c	y	y		n	y		y	paper	y
23321641	MCF10A Hygro	l	y	y		n	y	n	y	paper	y
23321641	D1K2	l	y	y		n	y	n	y	paper	y
23321641	D1K2(KD)	l	y	y		n	y	n	y	paper	y
23321641	293T cell line	c	n	n		n	y		y	paper	n
23219724	HEK293T	c	n	y		n	y	n	y	supplement	n
22976307	MDCK II	l		y		n	y	y	y	methods	n
22976307	MDCK II YA	l		y		n	y	y	y	methods	n
22976307	MDCK II 4NA	l		y		n	y	y	y	methods	n
22976307	MDCK II TMD3	l		y		n	y	y	y	methods	n
23314057	HEK293	c		y		n	y		y	supplement	n
23313818	V6.5	c	n	n		n	y		y	paper	n
23313818	iRasES Embryonic stem (ES)	c	n		n	n	y		y	paper	n
23348840	RPE-1	c	n		n	n	y		y	paper	n
23322302	HT29 human colon cancer cells	c	n	n		n	y		y	paper	n
23322302	293T cells	c	n		n	n	y		y	paper	n
23322302	HT29 shRB1	l	y		y		y	y	y	paper	y
23322301	NCI-H2347	c	y		y		y		y	paper	y
23322301	NCI-H1819,	c	y		y		y		y	paper	y
23322301	NCI-H2087	c	y		y		y		y	paper	y
23322301	NCI-H3122	c	y		y		y		y	paper	y
23322301	NCI-H2009	c	y		y		y		y	paper	y
23263557	p53−/− MEFs	l	y		y		y	y	y	sup data	y
23263557	Trex1−/− MEFs	l	y		y		y	y	y	sup data	y
23263557	C57BL/6 wild-type control MEFs	l	y		y		y	y	y	sup data	y
23263557	Ptpn1−/− MEFs	l	y		y		y	y	y	sup data	y
23263557	Ptpn1−/− MEFs rescued with Ptpn1 cDNA	l	y		y		y	y	y	sup data	y
23325261	HEK 293	c	y	y		n	y		y	paper	y
23325254	HEK293T	c	n	n		n	y		y	paper	n
23315288	Human prostate cancer cell line 22Rv1	c	y	y		n	y		y	paper	y
23292031	HepG2/C3A cells	c	n	n		n	y		y	paper	n
23291980	rat choroid plexus (RCP) cell line	c	y	n		n	y		y	paper	y
23291979	HepG2	c	y	n		n	y		y	paper	y
23291979	SMMC-7721,	c	y	n		n	y		y	paper	y
23291979	HL-7702	c	y	n		n	y		y	paper	y
23298865	BVE-E6E7	l	y		y		y		y	paper	y
23298864	RAW-Blue	c	y	y		n	y	n	y	paper	y
23298864	DC2.4	l	y		y		y		y	paper	y
23298864	HEK-NP cells	l	n	n		n	y	n	y	paper	n
23257508	SH-SY5Y human neuroblastoma cells (ECACC No. 94030304)	c	y	y		y	y		y	paper	y
23147113	HEK-293 T cells	c	n			n	y		y	paper	n
23253261	HeLa cells	c	n	n		n	y		y	paper	n
22985877	SA-54	l	y	n		n	y		y	paper	y
22985877	human melanoma Bowes	c	n	n		n	y		y	paper	n
23107604	PAC2	c		n	n	n	y		y	na	n
23107604	SH-SY5YhCD	l		y		n	y	y	y	methods	n
23127802	HEK293	c		y		n	y		y	methods	n
22985877	human melanoma Bowes	c		y			y		y	paper	n
22985877	SA-54	l		n		n	y		y	na	n
22865660	ZF4	c		y		y	y		y	paper	y
23317878	TM3 cell line	c	y	y		n	y		y	paper	y
23312859	293T	c	n	n		n	y		y	paper	n
23312859	BAFmyc21R	l	y		y		y	y	y	paper	y
23312859	IL-21-BAFmyc21R	l	y		y		y	y	y	paper	y
23312859	IL-21iso-BAFmyc21R	l	y		y		y	y	y	paper	y
23312859	empty-BAFmyc21R	l	y		y		y	y	y	paper	y
23320737	Murine endothelial cell line MS1	c	y	y			y		y	sup data	y
23313381	COS-7	c	n	n		n	y		y	paper	n
23313381	human embryonic kidney (HEK) 293 cells	c	n	n		n	y		y	paper	n
23321539	Human SH-SY5Y neuroblastoma cells	c	y	y		n	y		y	paper	y
23318105	Simian Vero cells (ATCC: CCL-81)	c	y	y		y	y		y	paper	y
23231968	HMEC-1	c		y		n	y		y	paper	y
23231968	THP-1	c		y		n	y		y	paper	y
23314171	HEK293	c		y		n	y		y	supplement	n
22907836	HEK293T	c		y		n	y	y	y	paper	n
23197652	HEK293	c		y		n	y		y	paper	n
23007696	Panc1	c		n		n	y		y	na	n
23007696	BxPC3	c		n		n	y		y	na	n
23007696	V3	c		n	y	n	y	y	y	na	y
23007696	S5	c		n	y	n	y	y	y	na	y
23138533	Hep3B	c		y		n	y		y	paper	y
23138533	MCF7	c		y		n	y		y	paper	n
23292650	SN4741	c		n		n	y		y	na	n
23412429	3T3-L1	c		y		n	y		y	supplement	n
23412429	PC3	c		y		n	y		y	supplement	n
23412429	MCF7	c		y		n	y		y	supplement	n
23412429	HT29	c		y		n	y		y	supplement	n
23412429	HepG2	c		y		n	y		y	supplement	n
23412429	CHL-1	c		y		n	y		y	supplement	n
23412429	NIH3T3	c		y		n	y		y	supplement	n
23412429	LLC-PK1	c		y		n	y		y	supplement	n
22947103	SHSY5Y	c		y	n	n	y		y	paper	n

## Sheet: Constructs
PMID	Reagent Name	If public or commercial, is it identifiable in a relevant database or vendor site?	If private or non-commercial source, is a reference/source identifiable?	If private or non-commercial source, is it deposited public database?	Catalog number	Gene uniquely identifiable	Sequence information	If uniquely identifable, is the info in the paper or supplementary data?	Is it uniquely identifiable?
23202854	pCS2+pard3-GFP	y			n	y	n	supplement	n
23202854	pCS2+pard3- RFP	y			n	y	n	supplement	n
23202854	pCS2+pard3-Δ6-EGFP	y			n	y	n	supplement	n
23202854	pCS2+CENTRIN-GFP	y			n	y	n	supplement	n
23202854	pCS2+CENTRIN-RFP	y			n	y	n	supplement	n
23202854	pCS2+EB3-GFP	y			n	y	n	supplement	n
23202854	pCS2+RAB11A-EGFP	y			n	y	n	supplement	n
23202854	pCS2+H2B-RFP	y			n	y	n	supplement	n
23202854	pCS2+CH-CAAX or mRFP	y			n	y	n	supplement	n
23202854	pCS2+mGFP	y			n	y	n	supplement	n
23202854	pCS2+GFP-ZO1	y			n	y	n	supplement	n
23202854	pT2KXIGΔin (DCX-GFP)	n	n		n	y	n		n
23219724	V5-tagged zCxcl8 (created using pcDNA6.2/V5-DEST)	y			n	y	y	supplement	y
23219724	EGFP-SHIP1				n	y	y		y
23219724	EGFP-SHIP1 (zebrafish)				n	y	y		y
23219724	EGFP-SHIP2a				n	y	y		y
23219724	TM-SHIP1				n	y	y		y
22245570	pCR4-TOPO zGH1	y			n	y	y		n
22245570	pCR4-TOPO zPOMCa	y			n	y	y	supplement	n
22245570	pCR4-TOPO zAgRP	y			n	y	y	supplement	n
23219724	zcxcl8-mcherry (pCAG vector)	n	y		n	y	y		n
23219724	C-terminally/6xHis-tagged zCxcl8 (pCAG vector)	n	y		n	y	y		n
23219724	zCxcl8-DM (pCAG vector)	n	y		n	y	y		n
23321640	chicken paxillin–GFP		y	y		y	y	paper	y
22946052	TagRFPGRP1- PH		y		n	y	n		n
22946052	AcGFP-TAPP1-PH		y		n	y	n		n
22946052	sec-mcherry(pCAG vector)	n	y		n	y	n		n
22976307	pCS2+YA	y			n	y	n	paper	n
22976307	pCS2+4NA	y			n	y	n	paper	n
22976307	pCS2+TMD3	y			n	y	n	paper	n
23314057	pEYFP-N1 MIB1	y			n	y	n	supplement	n
23314057	pECFP-N1 MIB1	y			n	y	n	supplement	n
23314057	pCS2 WT	y			n	y	n	supplement	n
23314057	pCS2 V943F	y			n	y	n	supplement	n
23314057	pCS2 R520X	y			n	y	n	supplement	n
23314057	pCS2 M989R	y			n	y	n	supplement	n
23314057	pcDNA3-JAGGED1	y			n	n	n	supplement	n
23314057	pNA3-GFP-ubiquitin	n			n	n	n		n
23314057	pEYFP-C1 WT	y			n	y	n	supplement	n
23314057	pECFP-C1 WT	y			n	y	n	supplement	n
23314057	pECFP-C1 V943F	y			n	y	n	supplement	n
23314057	pECFP-C1 R530X	y			n	y	n	supplement	n
23219724	pCS2-fmCherry	y	y		n	y	n	supplement	n
23314057	pCELF		y		n		n		n
23314057	pEF-Flag V943F		y		n	y	n		n
23314057	pEF-Flag R520X		y		n	y	n		n
23314057	pEF-Flag M989R		y		n	y	n		n
23314057	pEF-Flag WT		y		n	y	n		n
23321640	paxillin-S273D/A		y	n		y	n	paper	n
23321640	wild-type PAK1		y	n		y	n	paper	n
23321640	PAK2		y	n		y	n	paper	n
23321640	PAK3		y	n		n	n	paper	n
23273991	pFLAG- CMV4 plasmids encoding MDA5		n	n		n	n	sup	n
23273991	pFLAG- CMV4 plasmids encoding MDA5 mutants		n	n		n	n	sup	n
23260147	tetOP-OKSM		n	n		n	n	sup	n
23260147	M2rtTA,		n	n		n	n	sup	n
23273991	pET50- MDA5		y	n		n	n	sup	n
23273991	pET50- RIG-1		y	n		n	n	sup	n
23273991	pRL-CMV	y			n		n	sup	y
23348839	pcDNA3.1-PINK1-FLAG		n	n		n	n	sup	n
23348841	Ce SMG5		y	n		y	n	sup	n
23348841	SMG7		y	n		y	n	sup	n
23348840	pLVX-tight-HA-CEP83.		y	n		y	n	paper	n
23348840	pMXs-puro HA-Parkin		y	n		n	n	sup	n
23348840	pMXs-puro GFP-Parkin		y	n		n	n	sup	n
23348840	pMXs-puro- Rictor-Myc		y	y		y	n		n
23348840	pGEX6P	y			n		n	sup	n
23348840	pLVX-tight puro	y			n		n	paper	y
23348840	pMXs-puro	y			n		n	sup	y
23201120	pGEM-T pannexin-1	y			n	y	y	supplement	y
23313125	Has2 was generated by PCR and cloned upstream of the luciferase reporter in pGL3 Basic plasmid		y	n		y	y	paper	y
23201120	HuC:TdT-P2A-Kir2.1 Tol2		y		n	y	n		n
23201120	HuC:TdT-P2A-mKir2.1 Tol2		y		n	y	n		n
23201120	Coronin1a:eGFP-P2A-hCRIB-RasCT	n	y		n	y	n		n
23313125	pGL3 Basic	y			n		n	pape	y
23220656	Pcs2–plcg1	y			n	y	n	paper	n
23220656	Tol2(mpx: plcg1-2a-mCherry)	n			n	y	n		n
23220656	Tol2(flk1/mpx: plcg1-2a-mCherry)	n			n	y	n		n
23165295	pCS2-EGFP	y			n	y	n	paper	n
23165295	bcl2-GFP	n			n	y	n		n
23201577	pcDNA3.1	y			n		n	paper	y
23201577	pcDNA3.1-enc1l	y			n	y	n	paper	n
23201577	pcDNA3.1-wnt8b	y			n	y	n	paper	n
23201577	pcDNA3.1-fgf8	y			n	n	n		n
23329048	GDE1 (NM_019580)		y	n		y	y	sup	y
23329048	GDE2 (NM_001037271)		y	n		y	y		y
23329048	GDE3 (XM_420208)		y	n		y	y		y
23329048	GDE6 (XM_417276)		y	n		y	y		y
23329048	Dll1 (NM_007865)		y	n		y	y		y
23334416	pUbi-attB		y	n		y	n	online methods	n
23334416	Ubi–GFP–CAAX		y	n		y	n	online methods	n
23334416	pGAL4-attB		y	n		n	n	online methods	n
23334416	pGAL4-trh66		y	n		y	n	online methods	n
23329046	Residues 125-223 of human SLBP were sub-cloned into the pET-28a vector (Novagen)		y	n		y	n	sup	y
23172145	pGL4.13	y		n	n		n	online methods	y
23172145	pLKO.1	y		n	n		n	online methods	y
23172145	psPAX2	y		y	n		n	online methods	y
23172145	pMD2.G	y		y	n		n	online methods	y
23329046	pET-24d vector	y		n	n		n	sup	y
23285115	luciferase reporter construct	n	y		n	y	y	paper	n
23285115	pEF6 (G6fl-Y499F)	y			n	y	n	paper	n
23285115	pEF6 (G6fl-Y515F)	y			n	y	n	paper	n
23285115	pEF6 (G6fl-Y527F)	n			n	y	n	paper	n
23285103	pCS 2+ GFP 3X cdh5 mut siteA	y	y		n	y	y	supplement	y
23285103	pCS 2+ GFP 3X cdh5 siteA	y	y		n	y	y	supplement	y
23285103	pCS 2+ GFP 3X cdh5 siteB	y	y		n	y	y	supplement	y
23285103	pCS 2+ GFP 3X cdh5 mut siteB	y	y		n	y	y	supplement	y
23300383	pHUSH-ProEX vector		y	n			n	paper	n
23300383	FOXA1 responsive UGT2B17/-155ApGL3		y	n		n	n	paper	n
23271953	T-DNA constructs	n		n	n		n	paper	n
23271953	pRL-TK (Promega)	y			n		n	paper	y
23263557	pCW57d-P2AR		y	n		y	n	sup data	n
23263557	expression vector encoding mouse IL-7Rα		y	n		y	n	sup data	n
23263557	human IL-2Rγ		y	n		y	n	sup data	n
23263557	human Jak3		y	n		y	n	sup data	n
23263557	wild-type NFATc1		y	n		n	n	sup data	n
23263556	pME18	n		n	n		n	sup data	n
23345247	pCS2+ wtTARDBP	y			n	y	n	paper	n
23345247	pCS2+ mutTARDBP	y			n	y	n	paper	n
23365253	pDONR221	y			n		n	paper	y
23365253	pCSDest	y			n		n	paper	y
23365253	p3E-EGFP	n			n	y	n		n
23365253	pDestTol2pA	y			n		n	paper	n
23365253	p5E-CMV/SP6	y			n		n	paper	n
23365253	hsp:notum2	n			n	y	n		n
23365253	hsp:mutnotum2	n			n	y	n		n
23365253	hsp:notum1a.	n			n	y	n		n
23365253	CMV/SP6:notum2-egfp	n	n		n	y	n		n
23365253	pME-notum2	n	y		n	y	n		n
23365253	pME-notum2nostop	n	y		n	y	n		n
23365253	pME-mutNotum2	n	y		n	y	n		n
23365253	p5Ehsp70l	n	y		n	y	n		n
23365253	p3EIRES-eGFPCAAX	n	y		n	y	n		n
23325261	GFP-Kv2.1ΔC	n	n	n		y	n	only mentioned in results	n
23325261	GFP-Kv2.1-HA	n	y	n		y	n	in referenced publication	n
23325261	GFP-Kv1.4	n	y	n		y	n	in referenced publication	n
23325254	Rac1		y	n		y	n	paper	n
23325254	Cdc42		y	n		y	n	paper	n
23325254	DN–Rac1		y	n		n	n	paper	n
23325254	DN–Cdc42		y	n		n	n	paper	n
23413262	p.K7del-zTPM2-GFP	n			n	y	n		n
23413262	zTPM2-GFP	n			n	y	n		n
23278717	Venus-DS/pCS2		y	n		y	y	paper	y
23278717	RhoA		y	n		y	y	paper	y
23278717	Rac1		y	n		y	y	paper	y
23278717	Cdc42		y	n		y	y	paper	y
23186935	Oct60 promoter construct		n	n		y	n	paper	n
23186935	Rac17N		n	n		y	n	sup	n
23302037	pGEM-i2		y	n		y	n	paper	n
23302037	plasmid Ci-Hox1(i2)/lacZ.		y	n		y	n	paper	n
23302037	Ci-Hox1(i2Dp2)/lacZ,		y	n		y	n	paper	n
23302037	pGEM-i2Dp2		y	n		y	n	paper	n
23157381	p067Olactb:loxP-dsR2-loxP-EGFP		y	n		y	n	paper	n
23157381	pT2Olactb:loxP-dsR2-loxP-EGFP		y	n		y	n	paper	n
23157381	pT2hsp70l:mCherry-t2a-CreERt2		y	n		n	n	paper	n
23157381	pGL3-basic vector	y			n		n	paper	y
23157381	pRL-TK construct	y			n		n	paper	y
23157381	pGEM-T (Promega)	y			n		n	paper	y
23282990	Oct3/4	n			n	n	n	paper	n
23282990	Sox2	n			n	n	n	paper	n
23282990	Klf4	n			n	n	n	paper	n
23282990	c-Myc	n			n	n	n	paper	n
23147113	Pak1		y	y		y	y		y
23147113	Pak5		y	y		y	y	paper	y
23107604	pcDNA 3.1	y			n	y	n	paper	y
23107604	pcDNA 3.1	y			n	y	n	paper	y
23107604	hCD-mCHERRY	y			n	y	n	paper	n
23107604	Lamp1-YFP	y			y	n	n	paper	y
23127802	pcDNA3.1, inserted in pGL3	y			n	y	n	paper	n
23127802	pcDNA3.1, inserted in pGL3	y			n	y	n	paper	n
23127802	pcDNA3.1, inserted in pGL3	y			n	y	n	paper	n
23127802	pcDNA3.1, inserted in pGL3	y			n	y	n	paper	n
23127802	pcDNA3.1, inserted in pGL3	y			n	y	n	paper	n
23127802	pcDNA3.1, inserted in pGL3	y			n	y	n	paper	n
23127802	pcDNA3.1, inserted in pGL3	y			n	y	n	paper	n
23127802	pcDNA3.1, inserted in pGL3	y			n	y	n	paper	n
23127802	pcDNA3.1, inserted in pGL3	y			n	y	n	paper	n
23325254	Rac1		n	n		n	n	paper	n
23325254	Cdc42		n	n		n	n	paper	n
23267846	Syn-GFP 348 expression vector (pSynaptophysin-GFP-C1)		y	n		n	n	paper	n
23267846	Pak1 mutant		y	y		y	n	paper	n
23267846	DsRed2 (pDsRed2-N1)	y			n		n	paper	y
23124967	pCS2+	y			n	y	n	paper	y
22865660	CREST3:LexA-VP16,4xLexAop:mCherry	y			y	y	y	supplement	n
22865660	trpA1a:Gal4-VP16,14xUAS:KikGR	y			y	y	y	supplement	n
22865660	Fru.trkA:Gal4-VP16,14xUAS:GFP	y			y	y	y	supplement	n
22865660	Fru.trkA:LexA-VP16,4xLexAop:mCherry	y			y	y	y	supplement	n
22865660	Fru.trkB: Gal4-VP16,14xUAS:GFP	y			y	y	y	supplement	n
22865660	Fru.trkC:Gal4-VP16,14xUAS:GFP	y			y	y	y	supplement	n
22865660	Fru.p2x3-2: Gal4-VP16,14xUAS:GFP	y			y	y	y	supplement	n
22888055	Gfap:EGFP	y			n	y	n	paper	n
23312859	pEFneohIL-21		y	n		y	y	paper	y
23312859	pEFneohIL-21iso		y	n		y	y	paper	y
23312859	pEFneo		y	n		y	y	paper	y
23318105	pCAGGS-MCS		y	y		y	y	paper	y
23318105	pCAGGS-MCS-CD64		y	n		y	n	paper	n
23313381	cDNA-CHRNA3		y	n		y	n	paper	n
23313381	pcDNA-CHRNB4		y	n		y	n	paper	n
23313381	pEF-CHRNA3		y	n		y	n	paper	n
23313381	pcDNA3.1 (+)	y			n	n	n	paper	y
23253261	MARCH5-YFP expression plasmid		y	n		y	y	paper	y
23253261	Myc-MARCH5		y	n		y	y	paper	y
23173571	pCX-EGFP		y	n		y	n	paper	n
23234503	pYES-DEST52	y		n	n		n	paper	y
23234503	GAL1-CTR9	n			n		n	paper	n
23184466	pGEMT easy GAD1	y			n	y	n	paper	n
23184466	pGEMT easy gli1	y			n	y	n	paper	n
23184466	pGEMT easy dat	y			n	y	n	paper	n
23184466	pCS2 fgf19	y			n	y	n	paper	n
23184466	pCS2 atonal1a	y			n	y	n	paper	n
23184466	pCS2 vlut1	y			n	y	n	paper	n
23184466	pCS2 GABAARa6	y			n	y	n	paper	n
23289785	pUAST-DichaeteΔHMG		y	n		y	y	paper	y
23289785	pUAST-DichaeteEnRep		y	n		y	y	paper	y
23289785	pUAST-Dichaete		y	n		y	y	paper	y
23289785	pdaf-7::gfp reporter		y	n		y	n	paper	n
23289785	pmutdaf-7::gfp		y	n		y	n	paper	n
23059197	ploxPneo-1 plasmid		y	n			n	paper	n
23059197	p3loxDDlk1		y	n		y	n	paper	n
23116063	pPD95.75		n	y				paper	y
23108159	DUX4-fl	y			n	y	n	paper	n
23108159	DUX4-s	y			n	y	n	paper	n
23108159	HOX1mut	y			n	y	n	paper	n
23197652	pGEM-T	y			n		y	paper	y
23197652	pSP64-hAGGF1	n			n	y	y		n
23197652	pSP64-zVEGFA.	n			n	y	y		n
23197652	pSP64-zAGGF1.	n			n	y	y		n
23197652	pmCherry-N1	y			n	y	y	paper	y
23197652	pSP64-myrAKT1.	n			n	y	y		n
23174774	pGEX-6p-1	y			n	y	n	paper	y
23378909	pTol2-mlc2-grnA	n			n	n	n		n
23314171	pCMV.iGluSnFR	y			y	n	n	supplement	n
23314171	pRSET.GltI253-cpGFP.L1LV/L2NP	y			y	n	n	supplement	n
23314171	AAV.hSynapsin.iGluSnFR	y			y	n	n	supplement	n
23314171	AAV.GFAP.iGluSnFR	y			y	n	n	supplement	n
23314171	AAV.hSynapsin.FLEX-iGluSnFR	y			y	n	n	supplement	n
23314171	AAV.CAG.FLEX-iGluSnFR	y			y	n	n	supplement	n
23302694	Hb9:eGFP		y			y	n		n
23302694	UAS:DsRed		y			y	n		n
23302694	UAS: DsRed::UAS:hKir2.1		y			y	n		n
23302694	UAS:DsRed::UAS:hKir2.1mut		y			y	n		n
23302694	UAS:TeNT-Lc: EGFP		y				n		n
23302694	Hb9:Gal4		y			y	n		n
23166330	pCR4.0-TOPO	y			n	y	n	paper	y
23132861	pEGFP-N1-ngs	y			n	y	y	supplement	n
23132861	ngsmCherry	n			n	y	y		n
22907836	pIRES2-eGFP	n			n	y	y		n
22907836	pT7-CSAD-IRES2-EGFP	n			n	y	y		n
22907836	pT7-CSAD1Dstop-FLAG-IRES2- EGFP	n			n	y	y		n
22907836	pT7-CSAD2Dstop-FLAG-IRES2-EGFP	n			n	y	y		n
23132861	H2B-RFP	y			n	n	n	paper	n
23266606	Gateway middle entry vector	n			n	n	n		n
22985331	psox10:NPM-ALK (pCS2)	n	y		n	y	n	supplement	n
22985331	p-4725sox10:NPM-Ltk:IRES:eGFP (pCS2)	n	y		n	y	n	supplement	n
23178298	pGEM-T-easy	y			n	y	n	paper	y
23178298	pDsRed2-N1	y			n	y	n	paper	y
23178298	pEGFP-N1	y			n	y	n	paper	y
23178298	lif-SV40 poly(A)	n			n	y	n		n

## Sheet: Knockdown reagents
PMID	Reagent Name	If public or commercial, is it identifiable in a relevant database or vendor site?	If obtained from non-commercial source, is a reference/source identifiable?	Catalog number	Gene uniquely identifiable (includes organism)	Sequence information	If uniquely identifiable, is the info in the paper or supplementary data?	Uniquely identifiable
22946052	SHIP1 MO1				y	y	paper	y
22946052	SHIP1 MO2				y	y	paper	y
22946052	SHIP2a MO1				y	y	paper	y
22946052	SHIP2a MO1				y	y	paper	y
22946052	SHIP2a MO2				y	y	paper	y
22976307	MO against endolyn				y	y	paper	y
23382464	SDF1a morpholino				y	n		y
23382464	cxcr7a morpholinos				n	n		n
23382464	neurog1 morpholino				y	n		n
23382464	SDF1b morpholino				y	n	paper	n
23313552	Lentiviral shRNAs against human PTBP1		y		y	y	sup	y
23313552	Mouse REST		y		y	y	sup	y
23313552	mouse CoREST		y		y	y	sup	y
23313552	mouse CTDSP1		y		y	n	sup	n
23273992	Mouse Ell3 (RMM4534-NM_145973),	y		y	y		sup	y
23273992	Smc1a (RMM4534-NM_019710)	y		y	y		sup	y
23273992	Smc3 (RMM4534-NM_007790)	y		y	y		sup	y
23273992	Non-targeting shRNA construct (SHC002) was purchased from Sigma.	y		y	y		sup	y
23273992	Ell2 shRNA		y		y	n	sup	n
23321642	Cx43 siRNAs (sc-29276	y		y	y		paper	y
23321642	sc-35091-V	y		y	y		paper	y
23321642	26	y		y	y		paper	y
23321642	Scrambled siRNA (Santa Cruz Biotechnology)	n		n	n	n	paper	n
23321641	D1K2(KD)	n		n	n	n	paper	n
23219724	zcxcl8 splice-blocking morpholino				y	y	supplement	y
23219724	zcxcl8 translation-blocking morpholino				y	y	supplement	y
22245570	agrp ATG MO				y	y	supplement	y
22245570	agrp2 ATG MO				y	y	supplement	y
22245570	agrp E1I1 MO				y	y	supplement	y
22245570	agrp I1E2 MO				y	y	supplement	y
22245570	asp ATG MO				y	y	supplement	y
22245570	pomca ATG MO				y	y	supplement	y
23122293	Splice blocking morpholino targeting exon 4 of prdm16				y	y	supplement	y
23122293	Splice blocking morpholino targeting exon 4 of prdm16				y	y	supplement	y
23122293	translation morpholino targeting rfx5				y	y	supplement	y
23122293	Gfi1b morpholino sequence targeting the intron-exon boundary of exon 5				y	y	supplement	y
23122293	exon2/intron2 boundary of msrb2				y	y	supplement	y
23122293	exon4/intron4 boundary of tulp4				y	y	supplement	y
23202854	emi1-MO ATG				y	y	supplement	y
23202854	lamc1				y	y	supplement	y
23202854	p53				y	y	supplement	y
23052218	rgs4 MO1				y	y	paper	y
23052218	rgs4 MO2				y	y	paper	y
23313818	PKCl-1		y		y	y	paper	y
23313818	PKCl-2		y		y	y	paper	y
23313818	PKCz-1		y		y	y	paper	y
23313818	PKCz-2		y		y	y	paper	y
23313818	PKCz-3		y		y	y	paper	y
23348840	SCLT1		y		y	n	paper	n
23348840	FBF1		y		y	n	paper	n
23348840	CEP89		y		y	n	paper	n
23348840	Cep164 i		y		y	n	paper	n
23348840	Odf2	y		y	y		paper	y
23322302	pLKO.1-scramble		y		y	y	sup	y
23322302	shRNA targeting pRB		y		y	y	sup	y
23322302	RBF dsRNA #1		y		y	y	paper	y
23322302	RBF dsRNA #2		y		y	y	paper	y
23322302	Control dsRNA		y		y	n	paper	n
23322302	GFP		y		y	n	paper	n
23322301	NKX2-1		y		y	n	paper	n
23322301	LMO3		y		y	n	paper	n
23322301	AK2		y		y	n	paper	n
23322301	ALCAM,		y		y	n	paper	n
23322301	ANKS1A,		y		y	n	paper	n
23111152	Mdka morpholino (translation)				y	y	paper	y
23111152	Mdka morpholino (translation)				y	y	paper	y
23201120	pannexin-1 MO1				y	y	supplement	y
23201120	pannexin-1 MO2				y	y	supplement	y
23165295	Dio2				y	y	supplement	y
23165295	p53				y	y	supplement	y
23165295	Thraa #1				y	y	supplement	y
23165295	Thraa #2				y	y	supplement	y
23165295	Dio3				y	y	supplement	y
23318642	gna12 MO				y	y	paper	y
23318642	gna13a MO				y	n		n
23318642	gna13a MO				y	n		n
23318642	gna13b MO				y	y	paper	y
23318642	s1pr2/mil				y	y	paper	y
23220656	plcg1 MO				y	y	paper	y
23220656	faMO				y	y	paper	y
23201577	fgfr1 MO		y		y	n		n
23201577	wnt8 MO		n		n	n		n
23201577	ntl MO		n		n	n		n
23201577	enc1l-MO1				y	y	paper	y
23201577	enc1l-MO2				y	y	paper	y
23201577	enc1l-MO3				y	y	paper	y
23325758	cdh2 5'UTR				y	y	paper	y
23285115	G6fL Vivo-MO				y	y	paper	y
23285014	Contactin-2 antisense MO				y	y	paper	y
23349976	fzd3a-MO		y		y	y	paper	y
23349976	fzd7a-MO		n		y	y	paper	y
23349976	fzd7b-MO		n		y	y	paper	y
23349976	fzd9b-MO				y	y	paper	y
23349976	fzd10-MO				y	y	paper	y
23285103	Lmo2 MO_ATG_1				y	y	supplement	y
23285103	Lmo2 MO_ATG_2				y	y	supplement	y
23285103	miR-142a-3p MO				y	y	supplement	y
23326364	mmp14a-ATG-MO				y	y	paper	y
23326364	mmp14a-splice-MO				y	y	paper	y
23326364	mmp14b-ATG-MO				y	y	paper	y
23326364	mmp14bsplice- MO				y	y	paper	y
23326364	p53-MO				y	y	paper	y
23326364	mmp2-ATG-MO				y	y	paper	y
23271953	pGWB1		y		y	y	sup	y
23334421	human TP53		y		y	y	paper	y
23334421	mouse Trp53		y		y	y	paper	y
23334421	human ME1	y			y	y	paper	y
23334421	human ME2	y			y	y	paper	y
23334421	human ME1 no. 2	y			y	y	paper	y
23172145	Nlgn1 shRNA1	y		y	y		paper	y
23172145	shRNA2	y		y	y		paper	y
23172145	non-targeting shRNA	y		y	y		paper	y
23172145	mouse Nlgn2 knockdown shRNA1	y		y	y		paper	y
23172145	shRNA2	y		y	y		paper	y
23172145	non- targeting shRNA	y		y	y		paper	y
23329048	RECK shRNA1		y		y	y	sup	y
23329048	RECK shRNA2		y		y	y	sup	y
23329048	control shRNA.		y		y	y	sup	y
23263557	siRNA to Abcf1		y		y	y	sup data	y
23263556	lentivirus expressing NFATc1-specific shRNA	y		y	y		sup data	y
23263556	scrambled shRNA	y		y	y		sup data	y
23345245	ihhb MO				y	y	paper	n
23365220	six7 MO				y	y	paper	y
23365253	AUG-MO				y	y	paper	y
23365253	5'UTR MO				y	y	paper	y
23365253	Nrp1A MO				n	y	paper	n
23315288	pVHL-specific short interfering RNA (siRNA; Santa Cruz)	y		n	n	n	paper	y
23307302	Egr-2 siRNA vector		n		y	y	paper	y
23307302	control vector		n		n	n	paper	n
23269505	sense chicken aGSU riboprobes (GenBank accession no. AY436327, position: 402-1111)		y		y	y	paper	y
23211737	Sf3b14		y		y	y	paper	y
23211737	Sf3b1,		y		n	y	paper	y
23211737	Rpl7l1,		y		y	y	paper	y
23211737	Rrp7a		y		y	y	paper	y
23211737	GFP		y		y	y	paper	y
23302037	antisense morpholino oligonucleo- tide (MO) sequences for Ci-Raldh2		y		n	y	paper	y
23302037	Ci-RAR		y		n	y	paper	y
23257508	non-silencing control siRNA		y		y	y	paper	y
23257508	Nrf2 siRNA		y		y	y	paper	y
23147113	Pak1 shRNA		y		y	y	paper	y
23147113	vector control for rodent Pak1		y		n	n	paper	n
23074011	Lrmp-MO				y	y	paper	y
23074011	Dhx16-MO		y		y	y	paper	y
23074011	sass6-spliceMO				y	y	paper	y
23109401	prdm3 splicing e3i3 MO				y	y	paper	y
23109401	splicing i2e3 MO				y	y	paper	y
23109401	prdm16 ATG blocking Morpholino				y	y	paper	y
23109401	splice blocking e2i2 MO				y	y	paper	y
23109401	p53 MO				y	y	paper	y
23124967	5’UTR region of plakophilin 2				y	y	paper	y
23192979	rap1b MO1				y	y	paper	y
23192979	rap1b MO2				y	y	paper	y
23192979	ephrinB2a MO				y	y	paper	y
23294974	confused order sequence was designed as blank control		y		y	y	paper	y
23294974	IL-6-rat-410		y		y	y	paper	y
23106570	MVP antisense MO				y	y	paper	y
23219907	Otpa MO				y	y	paper	y
23219907	Otpb MO				n	n		n
23219907	Lmx1b.1 MO				y	y	paper	y
23219907	Lmx1b.2 MO				y	y	paper	y
23244389	morpholino Moarx		y		y	y	paper	y
23244389	morpholino MoTarx		y		y	y	paper	y
23244389	Mo1pax4 targeting exon 2 – intron 2 junction		y		y	y	paper	y
23244389	Mo2pax4 targeting exon 1 – intron 1 junction		y		y	y	paper	y
23116063	hsf-1 cDNA clone (yk1245f10, a gift of Yuji Kohara) w		y		n	n	paper	n
23313141	two FAK morpholino oligonucleotide		y		y	n	paper	n
23072875	zebrafish p53 morpholino		y		y	n	paper	n
23072875	standard control morpholino		y		n	n	paper	n
23072875	cc058		y		n	y	sup	y
23072875	clnd11a		y		n	y	sup	y
23072875	glipr2		y		y	y	sup	y
23184466	LG2 agrin MO				y	y	paper	y
23184466	Shh				y	n		n
23059813	alx1i1e2				y	y	paper	y
23059813	alx1AUG				y	y	paper	y
23059813	alx3e1i1				y	y	paper	y
23059813	alx3i1e2				y	y	paper	y
23087022	CA8 antisense MO1				y	y	paper	y
23087022	CA8 antisense MO2				y	y	paper	y
23087022	p53 MO sequence				y	y	paper	y
23302694	PlexinA3 MO				y	y	supplement	y
23174481	nrf2MO				y	y	paper	y
23378909	grnA antisense MOs				y	y	paper	y
23378909	grnA antisense MOs				y	y	paper	y
23378909	met MO				y	y	paper	y
23007696	S100P siRNA (On Targetplus)				y	n		n
23007696	S100P siRNA (Interferin)				y	n		n
23132861	Morpholino against ngs				y	y	paper	y
23184941	RasGRP1-MO				y	y	paper	y
23184941	RasGRP1-MO2				y	y	paper	y
23184941	Flt4-MO				y	y	paper	y
23229546	s1pr1 MO1				y	y	paper	y
23229546	s1pr1 MO2				y	y	paper	y
23229546	s1pr2 MO1				y	y	paper	y
23229546	s1pr2 MO2				y	y	paper	y
23229546	p53 MO				y	y	paper	y
23229546	spns2 MO				y	y	paper	y
23166330	anti-Stil				y	y	paper	y
23166330	anti-Sufu				y	y	paper	y
23292650	lxr morpholino				y	y	supplement	y
22907836	CSAD MO i2e3				y	y	paper	y
22907836	CSAD MO e8i8				y	y	paper	y
23266606	kdrl				y	y	paper	y
23266606	vegf-aa				y	y	paper	y
23266606	kdr				y	y	paper	y
23266606	ephrinb2a	n			y	y	paper	y
23266606	plcc				y	y	paper	y
23178298	Lif-MO				y	y	paper	y
23178298	Lifra-MO				y	y	paper	y
23178298	Lifrb-MO				y	y	paper	y

## Sheet: Organisms
PMID	Author supplied organism label	Organism species	Has paper already been curated in a MOD?	Is the genotype or allele identifiable in a MOD, or strain identifiable in a site such as Jax/Charles River?	Is the organism itself identifiable in a vendor or other site?	If obtained from non-commercial source, is a reference/source identifiable?	Identified organism strain/background	Transgenic gene uniquely identifable (source organism and gene)	NEW COLUMN: Is there a refence to the modified gene, such as MGI ID or Ensembl ID?	If uniquely identifable, is the info in the paper or supplementary data?	Uniquely identifiable	Wild type and uniquely identifiable	Wild type
23116063	PS3551 hsf-1(sy441)I	c.elegans	n	y			y	y	n	paper	y
23116063	FX04607 hsf-2(tm4607)I	c.elegans	n	y			n	y	n	paper	y
23116063	CB1370 daf- 2(e1370)III	c.elegans	n	y			y	y	n	paper	y
23116063	CB1372 daf-7(e1372)III	c.elegans	n	y			y	y	n	paper	y
23116063	RB2302 daf-7(ok3125)III	c.elegans	n	y			y	y	n	paper	y
23321643	GliAE2Δ45	fly	n	y		n				paper	y
23321643	GliCR2	fly	n	n		n				paper	n
23321643	UAS-GliWT	fly	n	n		y		y		paper	y
23321643	UAS-GliFF	fly	n	y		n		y		paper	y
23313126	botv103	fly	n	y		y				paper	y
23313126	sfl9B4 (	fly	n	y	n	y				paper	y
23313126	dally80	fly	n	y		y				paper	y
23313126	dlpA187	fly	n	y		n				paper	y
23313126	mirr-Gal4	fly	n	n		y		y		paper	y
23348839	dPINK1B9 (null mutant),	fly	n	y		n				sup data	y
23348839	UAS-yNDI1	fly	n	n		y		y		sup data	n
23348839	parkin1	fly	n	y		n				sup data	y
23348839	parkinΔ21,	fly	n	y		y		y		sup data	y
23348839	TH-GAL4,	fly	n	n		y		n		sup data	n
23348839	w1118	fly	n	y		n				paper	y
23348839	rbf120a	fly	n	n		n				paper	n
23334416	ubi-DE-cadherin-GFP (E-cad-GFP)	fly	n	n		y		y		paper	y
23334416	histone H2Av-mRFP (His-RFP)	fly	n	n		y		n		paper	y
23334416	sqh-mCherry (myosin-mCherry)	fly	n	n		n		n		paper	n
23334416	par-6-GFP	fly	n	n		y		y		paper	y
23334416	UAS-mCherry-CAAX	fly	n	n		y		n		paper	y
23226106	Canton-S (wild- type)	fly	n	n		n				paper	n
23226106	hiwND8	fly	n	y		y				paper	y
23226106	hiwDN	fly	n	n		y				paper	y
23226106	UAS-hiw	fly	n	n		y		y		paper	y
23226106	UAS-hiw-DRING	fly	n	n		y		y		paper	y
23300376	cidT12-1	fly	n	y		y				paper	y
23300376	cidT22-4	fly	n	y		y				paper	y
23300376	Cenp-Cprl41	fly	n	y		y				paper	y
23300376	cal1MB04866	fly	n	y		y				paper	y
23300376	Spc25c00064	fly	n	y		y				paper	y
23159780	w118 strain	fly	n	y		n				paper	y	y
23159780	nmnatΔ4792	fly	n	y		y				paper	y
23159780	UAS-Nmnat	fly	n	n		y		y		paper	y
23159780	UAS-HSF-eGFP	fly	n	n		y		y		paper	y
23159780	UAS-Sima	fly	n	n		y		y		paper	y
23289785	Dr72/TM6B	fly	n	y		n				paper	y
23289785	Df(3L)fz- GS1a/TM3 Sb1, w (should be Df(3L)fz- GS1a/TM3 Sb1)	fly	n	y		n				paper	y
23289785	p{GAL4-prosC20}C74-17,w (should be w; p{GAL4-prosC20}C74-17)	fly	n	n		n	y	y		paper	n
23289785	p{GAL4- sim3.7}2/CyO (should w; p{GAL4- sim3.7}2/CyO)	fly	n	y		n	y	y		paper	y
23217079	ATG1∆3D FRT80B	fly	n	y		n				paper	n
23217079	ATG5-RNAi	fly	n	n		y				paper	y
23217079	ATG13∆74 FRT82	fly	n	n		n				paper	n
23217079	ATG1∆3D FRT80B-UbiGFP	fly								paper	n
23217079	UAS-Notch-GFP	fly	n	n		y		y		paper	y
23238120	Cg-GAL4	fly	n	n		y		n		paper	y
23238120	omb3-GAL4	fly	n	n		y		n		paper	y
23238120	UAS-rpr	fly	n	n		y		y		paper	y
23238120	5xQE-dsRed	fly	n	y		y		y		paper	y
23238120	pucE69-lacZ	fly	n	y		n		y		paper	y
23085574	ric-8 null mutant fly (ric-8P587	fly	n	y		y				paper	y
23085574	ctaRC10; fog4a6	fly	n	y		n				paper (paper)	y
23085574	P{hsfog} (	fly	n	n		y		y		paper	y
23085574	G-ia65AP8	fly	n	n		n				paper	n
23085574	Gb13FD15	fly	n	y		y				paper	y
23186935	X. tropicalis	frog	y								y	y	y
23278717	Xenopus laevis	frog	n			n				paper	n	n	y
23321640	Xenopus laevis	frog	n			n				paper	n	n	y
23298196	C57BL /6	mice	n	y			y			paper	y	y	y
23290522	Prkca-/-	mice	n	y		y	y	y	n	paper	y
23290521	AND (H-2b)	mice	n	y		y	y	y	did nt check- would need to go back through many references)	sup data	y
23290520	4get BALB/c	mice	n	y			y	y	n	paper	y
23273845	Cx3cr1gfp/+ mice	mice	n	y		y	y	y	n	paper	n
23314004	C57BL/6 (wild-type)	mice	n	y			y			sup data	y	y	y
23291597	C3HeB/Fej	mice	n	y			y			sup data	y	y	y
23263556	C57BL/6	mice	n	y			y			sup data	n	n	y
23263555	Thy-1.1+	mice	n	y				y		sup data	y
23323935	BALB/c	mice	n	y			y			paper	y	y	y
23320737	Fli-1 allele (Fli-1∆CTA)	mice	n	y			y	y		paper	y
23317140	C57BL/6J	mice	n	y			y			paper	y	y	y
23311955	Foxp3eGFP	mice	n	y			y	y	n	paper	n
23322532	p75NTR (p75-/-)	mice	n	n		y	y	y	n	paper	n
23305954	C57BL/6J	mice	n	y			y			paper	y	y	y
23228673	P0-Cre/EGFP	mice	n	n		y	y	y		paper	y
23294897	SOD1-KO mice	mice	n	y			y	y		paper	y
23290828	C57BL/6	mice		y			y			paper	n	n	y
23282990	Cdyl–/–	mice	n	n				y		paper	n
23321539	C57BL/6J mice	mice	n	y			y			paper	n	n	y
23318243	C57/BLJ	mice	n	y			y			paper	y	y	y
23325260	floxed CNTFR􏰉 mice	mice	n	n		y	y	y		paper	n
10879655	mice (129/SvPasCrl) carrying the mutated allele for PKCδ	mice	n			y	y	y		paper	y
23059197	Dlk13lox mice	mice	n	y		y	y	y		paper	y
23318633	Atoh1Cre*PR x R26RlacZ	mice	n	n		y	y	n	n		n
23313818	ICR mice	mice	n	y		n	y			paper	y	y	y
23313125	Has2flox mice	mice	n	y		y	y	y	y	paper	y
23211737	B6D2F1 females (Jackson Laboratories Stock 100006)	mice	n		y		y			paper	y
23199370	C57B/ 6J × SJL/J	mice	n	y		n	y			paper	y	y	y
23174120	Kunming white mice	mice	n	n	n					paper	n
23021200	ICR mice	mice	n		y		y			paper	y	y	y
23300383	Balb/C Nude mice (Jackson Lab)	mice	n		y		y			paper	y
23300384	C57Bl/6J	mice	n		y		y			paper	y	y	y
23334418	Vegfafl	mice	n	y		y	y	y	n	paper	y
23334414	Tbx21−/−	mice	n	y		y	y	y	n	paper	y
23172145	Eif4ebp2 knockout	mice	n	n		n	y	n	n	C57BL/6J	n
23273993	CtnnbloxEx3/WT	mice	n	y		y	y	y	y	sup	y
23260147	Tbx21-ZsGreen mice	mice	n	y		y	y	y	T-bet in the BAC clone (RP23-237M14	sup	y
23147113	EphB1-/-	mice	n	y		y	y	y	n	paper	y
23321642	thymic NCR nude mice (nu/nu)	mice	n	y			y			paper	y
23321639	5-7 wk old mice	mice	n			n				paper	n	n	y
23271141	Swiss female mice,	mice	n		n		y			paper	n	n	y
23298866	BALB/c mice	mice	n	n	n		y			paper	y	y	y
23298864	C57BL/6 (H-2b)	mice	n	y			y			paper	y	y	y
23261832	C3H/HeJ	mice	n	y			y			paper	y	y	y
23261831	Trib3-deficient mice	mice	n	n		y	y	y	n	paper	y
23290521	Marilyn (H-2b)	mice	n	y		y	y	y	did nt check- would need to go back through many references)	sup data	y
23290521	5C.C7 (H-2k)	mice	n	y		y	y	y	did nt check- would need to go back through many references)	sup data	y
23290521	OTII	mice	n	y		y	y	y	did nt check- would need to go back through many references)	sup data	y
23290521	A1(M) (H-2k)	mice	n	y		y	y	y	did nt check- would need to go back through many references)	sup data	y
23290520	IgE-deficient 4getxRag2-/-	mice	n	y		y	y	y	n	paper	y
23290520	Mast cell-deficient KitW-sh/W-sh	mice	n	y		y	y	y	n	paper	y
23290520	Rosa-YFP	mice	n	y			y	y	n	paper	y
23290520	Ai6 mice were obtained from Jackson Laboratories (Bar Harbor, ME	mice	n	y			y	y	n	paper	y
23273845	Pgk-cre mice	mice	n	y		y	y	y	n	paper	y
23273845	Ccr2-/- mice	mice	n	y		y	y	y	n	paper	y
23273845	Ccr2-/-:Cx3cr1gfp/+ mice	mice	n	n		y	y	y	n	paper	n
23314004	B6.SJL-Ptprca Pep3b/BoyJ mice (congenic CD45.1+ mice on the C57BL/6 background)	mice	n	y			y	y		sup data	y
23314004	Il1r1−/−	mice	n	y			y	y		sup data	y
23314004	Tlr7−/−	mice	n	y			y	y		sup data	y
23314004	Mavs−/−	mice	n	y			y	y		sup data	y
23291597	TCR transgenic 8.6	mice	n	y			y	y		sup data	y
23291597	TCR transgenic 8.8	mice	n	y			y	y		sup data	y
23291597	Plp1-GFP	mice	n	n		y		y		sup data	n
23291597	Gfap-GFP	mice	n	y			y	y		sup data	y
23263556	Il2−/−	mice	n	y			y	y		sup data	n
23263556	Il7−/−	mice	n	y			y	y		sup data	n
23263556	Il7r−/	mice	n	y			y	y		sup data	n
23263556	Rag1−/−	mice	n	y			y	y		sup data	n
23263555	C57BL/6	mice	n	y			y			sup data	y	y	y
23263555	OT-II	mice	n	y			y	y		sup data	y
23263555	Rag2−/−	mice	n	y			y	y		sup data	y
23263555	C3−/−	mice	n	y			y	y		sup data	y
23311955	Sh2d1a-deficient mice	mice	n	y			y	y		paper	y
23329049	C57BL/6	mice	n	y			y			paper	n	n	y
23322532	p75+/+ WT	mice	n	n		y	y	y	n	paper	n
23322532	NGF/p75+/+	mice	n	n		y	y	y	n	paper	n
23322532	NGF/p75-/-	mice	n	n		y	y	y	n	paper	n
23305954	NSE-67 lstopl-DTA (diphtheria toxin A-fragment)/NesCreERT2	mice	n	n		y	y			paper	n
23305954	Nestin-GFP transgenic mice were kind gift	mice	n	n		y	y	n		paper	n
23228673	P0-Cre recombinase Tg mouse	mice	n	y			y	y		paper	y
23228673	CAG-CAT-EGFP Tg	mice	n	y			y	y		paper	y
23282990	Cdyl+/+	mice	n	n				y		paper	n
23318243	LPA1 receptor knockout (LPA1-/-)	mice	n	n	n			y		paper	y
23325260	CAG-CAT-EGFP reporter mice	mice	n	y			y	y		paper	y
23325260	hGFAP-Cre mice	mice	n	y			y	y		paper	y
23325260	ROSA26 mice	mice	n	y			y	y		paper	y
23325254	Cdc42 fl/fl	mice	n	y		y	y	y		paper	y
23325254	Rac1 fl/fl mice	mice	n	y		y	y	y		paper	y
23325254	NestinGFP	mice	n	n		y	y	y		paper	n
23325254	Nestin– CreER T2–R26YFP mice	mice	n	y		y	y	y		paper	y
23059197	Dlk1cons	mice	n	n		y	y	y	n	paper	y
23059197	EIIa-Cre mice	mice	n	y			y	y	n	paper	y
23318633	Atoh1Cre*PR x R26RtdTomato	mice	n	n		y	y	n	n		n
23313125	Shh-/-	mice	n	y		y		y		paper	y
23313125	Gli3xt	mice	n	y		y		y		paper	y
23300384	Bmal1 KO mice	mice	n	y		y		y	RPCI23−331K23, BACPAC resources, Children's Hospital Oakland Research Institute	paper	y
23300384	Cry1/Cry2 double KO mice	mice	n	y		y	y	y	n	paper	y
23334418	Chx10-cre	mice	n	y		y	y	y	n	paper	y
23334418	Opn4cre	mice	n	y		y	y	y	n	paper	y
23334418	Ai4	mice	n	n		y		n		paper	n
23334418	Opn4−/−	mice	n	y		y	y	y	BAC clone 23035 (Genme Systems, St. Louis, MO)	paper	y
23334414	Rorc(γt)GFP/+	mice	n	y		y	y	y	We identified one clone, I15, that contained all the Rorc locus	paper	y
23334414	Rorc(γt)–creTg	mice	n	y		y		y	n	paper	y
23334414	Rosa26RYFP/YFP	mice	n	y		y	y	y	n	paper	y
23334414	Ahr−/−	mice	n	y		y	y	y	n	paper	y
23172145	βT-Eif4e mice	mice	n	n		n	y	n	n	online methods	n
23273993	villin-creERT2 mice	mice	n	y		y	y	y	n	sup	y
23273993	Lgr5-EGFP- IRES-creERT2	mice	n	y		y	y	y	n	sup	y
23273993	Xbp1s-creERT2	mice	n	n		y	y	y	n	sup	n
23273993	Apc580S allele	mice	n	y		y	y	y	n	sup	y
23147113	EphB2-/-	mice	n	y		y	y	y	n	paper	y
23147113	EphB2Tr/Tr	mice	n	y		y	y	y	n	paper	y
23147113	EphB3−/−	mice	n	y		y	y	y	n	paper	y
23290865	C57BL/6	mice	n	y	y		y	y		paper	y	y	y
23122293	C57Bl/6	Mouse	n	y			y			supplement	y	y	y
23201900	C57BL/6	mouse	n	y			y			supplement	y
23314057	Nkx2.5-cre22	mouse	n	n	n	n		n			n
23314057	cTnT-cre23,	mouse	n	n	n	n		n			n
23314057	Cdh5(PAC)-creERT2	mouse	y	n	n	y	y	y		Supplement	y
23314057	Mib1flox	mouse	n	n	n	y	y	y		supplement	y
23314057	Jag1flox	mouse	n	n	n	y	y	y		supplement	y
23314057	R26R55	mouse	n	n	n		y	n			n
23292650	Lxrα−/−	mouse	n	n	n	y	y	y		paper	y
23292650	Lxrβ−/−	mouse	n	n	n	y	y	y		paper	y
23378677	BALB/cN	mouse	n	n							n	n	y
23314171	C57BL/6J	mouse	n	y			y			supplement	y	y	y
23314171	ICR	mouse	n	y		y				supplement	y	y	y
22815400	C57BL/6	mouse	n	y			y			paper	n	n	y
22754503	C57BL/6	mouse	n	y			y			paper	n	n	y
22553016	CBJ/Bl6	mouse	n	n			n			paper	n	n	y
22215995	CBJ/Bl6	mouse	n	n			n			paper	n	n	y
21602912	C57B/L6 mice	mouse	n	y			y			paper	y	y	y
21436050	C57BL/6 mice	mouse	n	y			y			sup data	n	n	y
20802489	C57Bl/6 mice	mouse	n	y			y			paper	n	n	y
20669363	mice	mouse	n	n			n			paper	n	n	y
19474329	young mice	mouse	n	n			n			paper	n	n	y
18084286	mouse	mouse	n	n			n			paper	n	n	y
17928562	mouse	mouse	n	n			n			paper	n	n	y
17996088	C57BL/6	mouse		y			y			paper	n	n	y
17522311	young mice	mouse	n	n			n			paper	n	n	y
17093092	C57BL/6	mouse		y			y			paper	n	n	y
16597718	young mice	mouse	n	n			n			paper	n	n	y
15901783	young mice	mouse	n	n			n			paper	n	n	y
22674266	V2r1b mice	mouse	n	y			y	y		paper	y
22674266	Notch1flox	mouse	n	n	n	y	y	y		supplement	y
22674266	Sprague-Dawley	rat	n	y			y			supplement	y	y	y
22674266	rat	rat	n	n	n						n	n	y
23325258	FBN rats	rat	n	y			y			paper	n	n	y
23246669	Adult female Sprague-Dawley (SD) rats	rat	n			y				paper	y	y	y
23291919	Sprague–Dawley rats	rat	n			y	y			paper	y	y	y
23307302	Male Sprague–Dawley rats	rat	n			y	y			paper	y	y	y
23325262	Male Long–Evans rats	rat	n	n	??		y				n	n	y
23294974	male Sprague Dawley rats	rat	n	y			y			paper	y	y	y
23262504	Male Wistar rats	rat	n	y			y			paper	n	n	y
23322547	Nile grass rats	rat	n	n			y			paper	n	n	y
23154073	W-TChR2V4	rat	n	n		y	y	y		paper	y
23321541	Wistar rats	rats	n	y			y			paper	y	y	y
23313710	Wistar rats	rats	n	y			y	y		paper	y	y	y
23313709	Sprague-Dawley rats	rats	n	y			y			paper	y	y	y
23325254	Fisher-344 rats	rats	n	y			y			paper	n	n	y
23325254	CX14651 kyEx4786 [rig-3::RCaMP1e, unc-122::GFP]	worm	n	n				n			n
23325254	CX14652 kyEx4787 [rig-3::iGluSnFR, unc-122::dsRed]	worm	n	n				n			n
23325254	CX14653 eat-4(ky5); kyEx4786	worm	n	n				n			n
23325254	CX14654 eat-4(ky5); kyEx4787	worm	n	n				n		supplement	y
23313141	L. variegatus	worm	n			n				paper	n	n	y
23313141	L. pictus	worm	n			y				paper	y	y	y
23234503	YKOv2	yeast	n		n		y			paper	y
23234503	mrc1Δ	yeast	n	n			y	n	n		y
23234503	bub3Δ	yeast	n	n			y	n	n		y
23234503	sch9Δ	yeast	n	n			y	n	n		y
23234503	ydr417cΔ	yeast	n	n			y	n	n		y
23345232	PS1 hu2547	zebrafish	n	n	n	y	y			paper	y
23165607	Tg(9.0spi1:EGFP)zdf11 also called pu.1:EGFP	zebrafish	n	y		y	y	y		paper	y
23074011	cei	zebrafish	n	n	y	y	y			paper	y
23074011	futile cycle	zebrafish	n	y		y	y			paper	y
23074011	motley	zebrafish	n	n	n	n	n	n		paper	y
23074011	mission impossible	zebrafish	n	n	n	y	y			paper	y
23345247	Hb9promoter driving GFP (cyan)	zebrafish	n	n	n	n		n		(in a figure)	n
23349976	TOP:dGFP	zebrafish	n	n	n	n		n			n
23349976	sox10 m618	zebrafish	n	y			y	y		paper	y
23285103	Tg(fli1:EGFP)y1	zebrafish	n	y			y	y		paper	y
23285103	Tg(gata1a:dsRed)sd2	zebrafish	n	y			y	y		paper	y
23219724	Tg(mpx:GFP)	zebrafish	n	n	n	y	y	y		supplement	y
23157381	Tg(hsp70l:mCherry-t2a-CreERt2)	zebrafish	n	n	n	n		y			n
23157381	Tg(Olactb:loxP-dsR2-loxP-EGFP)	zebrafish	n	n	n	n		y			n
22985331	ltkty82	zebrafish	n	y		y	y			supplement	y
23345245	Tg(olig2:egfp)	zebrafish	n	n	n	y	y	y		paper	y
23345245	Tg(olig2:dsred)	zebrafish	n	n	n	y	y	y		paper	y
23345245	Tg(hsp70:gal4 )	zebrafish	n	n	n	y	y	y		paper	y
23345245	Tg(uas:shha)	zebrafish	n	n	n	y	y	y		paper	y
23345245	Tg(hsp70:ihhb:mCherry)	zebrafish	n	n	n	y		y			n
23326364	Tg(Ath5:EGFP)	zebrafish	n	n	n	y	y	y		paper	y
23109401	narrowminded^m805	zebrafish	n	y		y	y			paper	y
23109401	prdm5^hi61Tg	zebrafish	n	y		y	y			paper	y
23109401	tp53^M214K	zebrafish	n	y		y	y			paper	y
23111152	Tg(pHSP70/4:mdka:egfp)kec1001L3	zebrafish	n	n	n		n	y			n
23111152	Tg(pHSP70/4:mdka:egfp)kec1004L4	zebrafish	n	n	n		n	y			n
23111152	Tg(pHSP70/4:mdka:egfp)kec1004L6	zebrafish	n	n	n		n	y			n
23349637	tert^hu3430	zebrafish	n	y			y			paper	y
23349637	tp53 zdf1/zdf1	zebrafish	n	y			y			paper	y
22946052	Tg(mpx:dendra2)	zebrafish	n	y	n	n	y	y		paper	y
22946052	Tg(lyz:TagRFP)	zebrafish	n	y		y	y	y		paper	y
22946052	Tg(mpx:mCherry)	zebrafish	n	y		y	y	y		paper	y
23043290	Tg(oc2:gfp; osx:mcherry)	zebrafish	n	n	n	y	y	n		paper	y
22245570	sa0122	zebrafish	n	y			y			supplement	y
22245570	sa0148	zebrafish	n	y			y			supplement	y
22245570	sa0149	zebrafish	n	y			y			supplement	y
22736487	Tg(glyt2:gfp)	zebrafish	n	n	n	y	y	y		paper	y
23201120	Tg(Apo-E:eGFP)	zebrafish	n	n	n	y	y	y		supplement	y
23201120	Tg(Coronin1a:DsRed)	zebrafish	n	n	n	y	y	y		paper	y
23201120	Tg(Mu-4380)	zebrafish	n	y		y	y	y		paper	y
23059813	Tg(-4.9sox10:eGFP)ba2	zebrafish	n	y			y	y		paper	y
23059813	tp53 null-mutant	zebrafish	n	y	n	y	y	y		paper	y
23108159	Tg(a-actin:EGFP)	zebrafish	n	n	n	y	n	n		paper	y
23132861	ngs mutant	zebrafish	n	n	n	y		y			n
23132861	mp398b	zebrafish	n	n	n	y		n			n
23132861	ngs transgenic fish	zebrafish	n	n	n	y		y			n
23302694	Et(20.6hsp70l:Gal4- VP16)s1020t	zebrafish	n	y			y	y		supplement	y
23302694	UAS:GCaMP3	zebrafish	n	n	n	y	y	y		supplement	y
23302694	Tg(mnx1:mGFP)ml3	zebrafish	n	y			y	y		supplement	y
22865660	Gt(T2KSAG)j1229a	zebrafish	n	y			y	y		paper	y
22865660	Tg(isl1:Gal4-VP16,UAS:EGFP)zf154	zebrafish	n	y			y	y		supplement	y
22865660	Tg(isl1:Gal4-VP16,UAS:dsRed)zf234	zebrafish	n	y			y	y		supplement	y
22865660	Tg(CREST3:Gal4-VP16,14xUAS:EGFP)la204	zebrafish	n	n	n	y	y	y		supplement	y
22865660	Tg(CREST3:Gal4-VP16,14xUAS:KikGR)la205	zebrafish	n	n	n	y	y	y		supplement	y
22865660	Tg(Fru.trkA:Gal4-VP16,14xUAS:ChR2-YFP)la206	zebrafish	n	n	n	y	y	y		supplement	y
22865660	Tg(Fru.p2x3-2[-1036:-731]:LexA-VP16,4xLexAop:mCherry)la207	zebrafish	n	n	n	y	y	y		supplement	y
22865660	Tg(isl1(ss):Gal4-VP16,14xUAS:KikGR)	zebrafish	n	n	n	y	y	y		supplement	y
22865660	Tg(-17.6isl2b:GFP)zc7	zebrafish	n	y			y	y		supplement	y
22865660	Gt(PKCα-citrine), herein called PKCα^ct7a	zebrafish	n	n	n	y	y	y		supplement	y
22865660	Tg(trpA1b:EGFP)a4593	zebrafish	n	y			y	y		supplement	y
22865660	Tg(p2rx3b:EGFP)sl1	zebrafish	n	y			y	y		supplement	y
22888055	(Ngn:EGFP)	zebrafish	n	n	n	y	y	y		paper	y
22888055	Alx transgenic line	zebrafish	n	n	n	y	y	y		paper	y
22648905	albino	zebrafish	n	n	n	n	n	n		(info was in paper)	n
22648905	mpeg1:EGFP gl22	zebrafish	n	y			y	y		paper	y
22648905	mpeg1: mCherry gl23	zebrafish	n	y			y	y		paper	y
22706793	F0104	zebrafish	n	y		y	y	y		paper	y
22706793	CD41-GFP	zebrafish	n	n		y	y	y		supplement	y
22843140	Tg(-8.0cldnb:lynEGFP)	zebrafish	n	y		y	y	y		paper	y
23124967	Tg(fli1:EGFP)	zebrafish	n	n		y	y	y		paper	y
23124967	Tg(pck1:Luc2,cryaa:mCherry)s952	zebrafish	n	n	n		y	y		supplement	y
23124967	Tg(pck1:Venus,cryaa:mCherry)s953	zebrafish	n	n	n		y	y		supplement	y
23124967	Tg(fabp10a:GFP)as3	zebrafish	n	y			y	y		supplement	y
23202854	Tg(UAS:mCherry-Rab11a S25N)mw35	zebrafish	n	y			y	y		Supplement	y
23202854	tg(Krox20–RFP–KalTA4)	zebrafish	n	n	n	y	y	y		Supplement	y
23202854	Gt(Ctnna–citrine)ct3a	zebrafish	n	y			y	y		Supplement	y
23184941	Tg (fli1:EGFP)y1	zebrafish	n	y			y	y		paper	y
23184941	bfetig453	zebrafish	n	y			y			paper	y
23192979	bfethl30	zebrafish	n	n	n		y			paper	y
23192979	Tg(hsp70:ΔTCFGFP) w26	zebrafish	n	y			y	y		paper	y
23192979	Tg(gfap:GFP)mi2002	zebrafish	n	y			y	y		paper	y
22920725	mbl	zebrafish	n	n	n	y	y			paper	y
23165295	Tg(sox10::EGFP)	zebrafish	n	n	n	n	y	y		paper	y
23165295	Tg(foxd3::EGFP)	zebrafish	n	n	n	y	y	y		paper	y
23165295	Tg(aactin:: EGFP)	zebrafish	n	n	n	y	y	y		paper	y
23165295	roy	zebrafish	n	n	n	n	y			paper	y
23159952	Tg(Col2a1aBAC:mcherry)	zebrafish	n	n	n	y	y	y		paper	y
23159952	Tg(OlSp7:mCherry) zf131	zebrafish	n	y			y	y		paper	y
23159952	Tg(Col10a1BAC:mCitrine)	zebrafish	n	n	n	n	y	y		paper	y
23143102	Et(gata2a:EGFP)pku684	zebrafish	n	n	n	n	y	y		paper	y
23143102	Et(gata2a: EGFP)pku760	zebrafish	n	n	n	n	y	y		paper	y
23143102	lmo2^pku684ld	zebrafish	n	n	n	n	y			paper	y
23229546	Tg(fli:EGFP)y1	zebrafish	n	y			y	y		paper	y
23229546	Tg(flk1:ras-mCherry)s896	zebrafish	n	y			y	y		paper	y
23229546	Tg(flk1:EGFP-NLS)	zebrafish	n	n	n	y	y	y		paper	y
23229546	Tg(gata1:dsRed)	zebrafish	n	n	n	y	y	y		paper	y
23229546	Tg(mlc2a:GFP)	zebrafish	n	n	n		n	n			n
23229546	mibta52b/ta52b	zebrafish	n	y			y	y		supplement	y
23229546	Tg(Tp1bglob:eGFP)um14	zebrafish	n	y			y	y		supplement	y
23166330	night blindness b (nbb)	zebrafish	n	y		y	y			paper	y
22947103	enhancer-trap BAC	zebrafish	n	n	n	n		y			n
22947103	enhancer-trap BACs	zebrafish	n	n	n	n		y			n
23336074	Tg(hsp70l: wnt8a-GFP)w34	zebrafish	n	y			y	y		paper	y
23336074	Tg(hsp70l:Mmu.Axin1-YFP)w35	zebrafish	n	y			y	y		paper	y
23336074	Tg(hse:ca-b-catenin-MYC,EGFP)w75	zebrafish	n	y			y	y		paper	y
23336074	Tg(fabp10:RFP,ela3l:EGFP)gz12	zebrafish	n	y			y	y		paper	y
23336074	Tg(ptf1a:EGFP)jh1	zebrafish	n	y			y	y		paper	y
23266606	Tg(kdrl:EGFP)s843	zebrafish	n	y			y	y		paper	y
23231968	Tg(fli1:EGFP)y1	zebrafish	n	y			y	y		paper	y
23350700	fgf20azp3	zebrafish	n	y			y			paper	y
23350700	dn-fgfr1-EGFPpd1	zebrafish	n	y			y	y		paper	y
23365220	Xops:mCFPq13	zebrafish	n	y			y	y		paper	y
23365220	pde6cw59	zebrafish	n	y			y			paper	y
23365220	nyx:mYFPq16, Tg(UAS:gap43-YFP)q16b; Tg(nyx:Gal4-VP16)q16a	zebrafish	n	y			y	y		paper	y
23365220	lorp25bbtl	zebrafish	n	y			y			paper	y
23365253	disp1 tm15a	zebrafish	n	y			y			paper (figure caption)	y
23378909	Tg(mlc2:EGFP)	zebrafish	n	n	n	n	n	y		paper	y
23378909	Tg(mlc2:grnA)	zebrafish	n	n	n	n	n	y		paper	y
23382464	cxcr7b^sa16	zebrafish	n	y			y			paper	y
23382464	cxcr4b^t26035	zebrafish	n	y			y			paper	y
23382464	dicer^hu715	zebrafish	n	y			y			paper	y
23382464	hsp70:SDF1a	zebrafish	n	y		y	y	y		paper	y
23382464	hsp70:xxcr7b	zebrafish	n	n		y	y	y		paper	y
23382464	SDF1a^t30516	zebrafish	n	y			y			paper	y
23382464	tg(cxcr4b: cxcr4b-EGFP-IRES-kate2-CaaX)p1	zebrafish	n	n		y		n		paper	y
23318642	Tg(myl7:EGFP)	zebrafish	n	n		y	y	y		paper	y
23318642	Tg(sox17:EGFP)	zebrafish	n	n		y	y	y		paper	y
23318642	mil^m93	zebrafish	n	y			y			paper	y
23318642	Tg(myl7:gna13a-IRES-nlsGFP)	zebrafish	n	n	n			y		supplement	y
23220656	ldd239	zebrafish	n	n	n					paper	y
23228892	Tg(foxd3:GFP)	zebrafish	n	n	n	y	y	y		paper	y
23228892	Gt(foxd3- mcherry)ct110aR	zebrafish	n	n	n	n	y	y		paper	y
23228892	Gt(foxd3-citrine)ct110a	zebrafish	n	y			y	y		paper	y
23362350	Tg(cmlc:GFP-sox10:ERT2-Cre)	zebrafish	n	n	n			y		paper	y
23362350	Tg(rps9:loxP-DsRed2-loxPEGFP)	zebrafish	n	n	n			y		paper	y
23362350	Tg(β-actin2:loxP-STOPloxP- DsRed-express)	zebrafish	n	n	n	y	y	y		paper	y
23362350	Tg(ubi:loxP-EGFP-loxP-mCherry)	zebrafish	n	y		y	y	y		paper	y
23362350	Tg(EF1α:loxP-DsRed2-loxP-EGFP)	zebrafish	n	n	n	y	y	y		paper	y
23362350	Tg(hsp70l:loxP-DsRed2-loxPnlsEGFP)	zebrafish	n	y		y	y	y		paper	y
23362350	Tg(crestin:Gal4-UAS-GFP)	zebrafish	n	y		y	y	y		paper	y
23362350	Tg(−4725sox10:Cre)	zebrafish	n	n		n		y		paper	y
23228893	nanos3(fh49)	zebrafish	n	y			y			paper	y
23228893	Tg(ziwi:eGFP)	zebrafish	n	y		y	y	y		paper	y
23382343	dt2	zebrafish	n	y			y			supplement	y
23382343	t1	zebrafish	n	y			y			supplement	y
23382343	tp53zdf1	zebrafish	n	y			y			supplement	y
23382343	alf ty86d	zebrafish	n	y			y			supplement	y
23382343	umas2068	zebrafish	n	y			y			supplement	y
23382343	koitl226d	zebrafish	n	y			y			supplement	y
23382343	tr233	zebrafish	n	y			y			supplement	y
23382343	mitfa−/−	zebrafish	n	y			y			supplement	y
23382343	roy−/−	zebrafish	n	y			y			supplement	y
23412429	casper	zebrafish	n	n	y	n	n				n
23412429	Tg(L-fabp:dsRed)	zebrafish	n	n	n	n		y			n
23201575	zf104	zebrafish	n	y		y	y	y		paper	y
23201575	c162	zebrafish	n	y		y	y	y		paper	y
23201575	vu125	zebrafish	n	y		y	y			paper	y
23201575	m134	zebrafish	n	y		y	y			paper	y
23201575	cz35	zebrafish	n	y		y	y			paper	y
23201575	p73	zebrafish	n	n	n	n					n
23201575	tz257	zebrafish	n	y		y	y			paper	y
23197652	la116	zebrafish	n	y			y	y		paper	y
23052218	Tg(huC:eGFP)	zebrafish	n	n	n	n		y			n
23052218	Tg(islet1:GFP)	zebrafish	n	n	n	y	y	y		paper	y
23293289	pac tm101B	zebrafish	n	y		y	y			paper	y
23293289	hsΔTCF-GFP	zebrafish	n	n		y	y	y		paper	y
23293297	Z-CAT	zebrafish	n	n	n	y	y	y		paper	y
23293297	shh:EGFP	zebrafish	n	n	n	y	y	y		paper	y
23293297	cmlc2:CreER	zebrafish	n	n	n	y	y	y		paper	y
23293297	bactin2:loxp-mCherry-STOP-loxp-DTA	zebrafish	n	n	n	y	y	y		paper	y
23293297	cmlc2:nuc-DsRed2	zebrafish	n	n	n	y	y	y		paper	y
23293297	Tg(cmlc2:mCherryzCdt1) pd57	zebrafish	n	n	n	y	y	y		paper	y
23293297	Tg(cmlc2:Venus-hGeminin)pd58.	zebrafish	n	n	n	y	y	y		paper	y
23293297	Tg(GBS-ptch2:EGFP)umz23	zebrafish	n	y		y	y	y		paper	y
23267077	(ETvmat2:GFP)	zebrafish	n	y		y	y	y		paper	y
23267077	Tg(isl1[ss]:Gal4-VP16,UAS:EGFP)zf154	zebrafish	n	y			y	y		paper	y
23325758	Tg(HuC:GFP)	zebrafish	n	n	n	y	y	y		paper	y
23325758	Tg(islet1:GFP)	zebrafish	n	n	n	y	y	y		paper	y
23325758	Tg(pGFP5.3)	zebrafish	n	n	n	y	y	y		paper	y
23325758	Tg(zCREST1:membRFP)	zebrafish	n	y	n	y	y	y		paper	y
23007696	fli1:EGFP	zebrafish	n	n	n			n			n
23244389	Zebrafish (Danio rerio) embryos and adults (AB strain	zebrafish	n		n		y			paper	n	n	y
23072875	Tg(fli1a:egfp)y1	zebrafish		y		n	n			paper	y
23157381	medaka Tg	zebrafish	n	n	n	y	y	n	n	paper	n
22985877	Adult Zebrafishes (Danio rerio)	zebrafish	n			n	y			paper	n	n	y
23321642	Zebrafish	zebrafish	n			n				paper	n	n	y
23157381	Tg(hsp70l:mCherry-t2a-CreERt2)	zebrafish	n	y	n	y	n		n	paper	y
23157381	Tg(Olactb:loxP-dsR2-loxP-EGFP)	zebrafish	n	y	n	y	n		n	paper	y
23311920	B6.SJL/J-Ptprca (CD45.1)	mice	n	y			y	y		paper	y
23311920	C57BL/6	mice	n	y			y			paper	y	y	y
23311920	C57BL/6-RAG-1-/-	mice	n	y			y	y		paper	y
23311920	TCR transgenic OT-I (243.2) mice (	mice	n	y			y	y		paper	y
23324648	C57BL/6j	mice	n	y			y			paper	y	y	y
